## 31 **Abstract**

32

33         The default mode network (DMN), the salience network (SN), and the central executive  
34 network (CEN) could be considered as the core resting-state brain networks (RSN) due to their  
35 involvement in a wide range of cognitive tasks. Despite the large body of knowledge relating to  
36 their regional spontaneous activity (RSA) and functional connectivity (FC) of these networks, less  
37 is known about the influence of task-associated activity on these parameters and on the  
38 interaction between these three networks. We have investigated the effects of the visual-oddball  
39 paradigm on three fMRI measures (amplitude of low-frequency fluctuations for RSA, regional  
40 homogeneity for local FC, and degree centrality for global FC) in these three core RSN networks.  
41 A rest-task-rest paradigm was used and the RSNs were identified using independent component  
42 analysis (ICA) on the resting-state data. We found that the task-related brain activity induced  
43 different patterns of significant changes within the three RS networks. Most changes were strongly  
44 associated with the task performance. Furthermore, the task-activity significantly increased the  
45 inter-network correlations between the SN and CEN as well as between the DMN and CEN, but  
46 not between the DMN and SN. A significant dynamical change in RSA, alongside local and global  
47 FC within the three core resting-state networks following a simple cognitive activity may be an  
48 expression of the distinct involvement of these networks in the performance of the task and their  
49 various outcomes.

50

51

52

53

54

## 55 Introduction

56

57 Examination of regional spontaneous brain activity (RSA) and functional connectivity (FC)  
58 during resting-state (RS) conditions appears to be a promising approach for understanding brain  
59 organization at the systems level [1]. Within the several stable RS networks identified up to now,  
60 three networks stand out for their importance and synchronized interplay: the default mode  
61 network (DMN), the salience network (SN), and the central executive network (CEN). These  
62 networks are often jointly referred to as the triple network model [2] and are considered to be the  
63 core neurocognitive networks due to their involvement in a wide range of cognitive tasks [1,3,4].

64

65 Specifically, the DMN is known to be a task-negative network associated with self-  
66 referential thoughts and mind-wandering [5]. It shows decreased activation during tasks in which  
67 self-referential and stimulus-independent intellectual activity is not involved [6,7]. Even more,  
68 numerous studies have demonstrated that midline DMN regions are among the most efficiently  
69 wired brain areas, serving as global hubs that bridge different functional systems across the brain  
70 [8,9]. Increased DMN connectivity with regions of other brain networks has been shown to  
71 facilitate performance during goal-directed tasks [10]. Thus, DMN is not engaged only under  
72 resting-state conditions but also under task performance and post-task processes as well [10-12].

73

74 The CEN is a task-positive network, engaged in higher-order cognitive and attention  
75 control as well as in working memory, decision making and goal-directed behavior [13-15].  
76 Conversely, the SN is involved in detecting, filtering and integrating relevant internal (e.g.,  
77 autonomic input) and external (e.g., emotional information) salient stimuli in order to guide

78 behavior [1,16]. Furthermore, it displays a crucial role in the functional and dynamic switching  
79 between the DMN and CEN (i.e., between task-based and task-free states) [17,18].

80

81         Dynamic interactions between the three networks of the triple network model influence  
82 cognition and emotion, affecting performance and impulsivity [19-21]. Moreover, an altered  
83 interaction between these networks has been shown in patients with major depressive disorder  
84 [22], post-traumatic stress disorder [23], obsessive-compulsive disorder [24], and schizophrenia  
85 [25,26]. Altogether, an increasing body of evidence suggests that aberrant function of the triple  
86 networks underlies the psychopathology of all major psychiatric disorders [27] and disturbed  
87 functional interactions among them may be considered a potential neurophysiological biomarker  
88 for different psychopathological phenomena across several neuropsychiatric disorders [28]. It is  
89 therefore particularly important to understand the physiological fluctuations in the activity and  
90 interactions of these networks in order to be able to differentiate them from pathological  
91 conditions.

92

93         Continuous fluctuations of the main properties of the networks (as RSA and FC) have  
94 been shown during rest and during task-associated activities [29,30]. Much less is known about  
95 the extent to which these properties can be influenced by a specific task and to what extent a  
96 task-associated activity affects the interaction between the networks.

97         A simple method to investigate the effects of task-related activation on the RSA is the rest-  
98 task-rest paradigm (RTR) [5,31]. To date, a task-induced modulation of the RSA has been  
99 observed following cognitive tasks involving working memory, emotion, visual perception, and  
100 motor training. However, previous studies have mainly focused on whole-brain [31-35] or on  
101 specific brain structures known to be involved in the tasks [36,37]. None of the mentioned studies

102 has specifically addressed the impact of a task on the triple network. Moreover, previous  
103 investigations have overall changes in static connectivity in different time periods (before and after  
104 the task), but changes in the relationship between the different networks (particularly in the triple  
105 network, which is the focus of this study) remain poorly understood. Thus, in this study, we have  
106 specifically examined task-induced changes in RSA and FC in the triple network of the RS (DMN,  
107 SN and CEN) and the task-induced effects on the interactions between them.

108

109         Concretely, this study aims to assess the extent of the influence exerted by a well-  
110 established task - the visual oddball paradigm [38] on the post-task RS in the regions of the triple  
111 network using the RTR design. The visual oddball paradigm task was chosen as it elicits the blood  
112 oxygen level dependent (BOLD) response in a large set of distributed networks [39-43]. In  
113 particular, the task performance is associated with activation in brain regions linked to the three  
114 networks (the SN [44], the dorsolateral prefrontal cortex (CEN) [45,46], and the cingulate and  
115 prefrontal cortex (DMN) [47].

116         For the identification of the triple network regions we applied a group independent  
117 component analysis (ICA) to the RS data. Several different measures of FC can be calculated  
118 from fMRI, each reflecting a different property of the brain networks. For this approach, we chose  
119 two such measures, the regional homogeneity (ReHo) [48] the degree centrality (DC) [49], as  
120 these are suitable for investigating the voxel level local and global FC, respectively. Furthermore,  
121 the amplitude of low-frequency fluctuations (ALFF) [50], is suitable for depicting the RSA.  
122 Combining these measures enables the complementary characterization of changes in activation  
123 and communication of specific networks or regions.

124

125           We hypothesised that the task-based activity would distinctly affect the RS RSA as well  
126 as the local and the global connectivity in the triple network. Due to the central role of the SN  
127 during the occurrence of salient stimuli or during the performance of a cognitive task, we also  
128 expected internetwork functional connectivity to increase between the SN and the other two  
129 networks of the triple network model (DMN, CEN).

## 130 **Materials and Methods**

### 131 **Subjects**

132           21 right-handed healthy subjects (17 males and four females) were included in this study  
133 (age range between 19 to 40 years; mean:  $29 \pm 5.6$  years). All subjects were healthy and without  
134 a history of neurological or psychiatric disorders. The study was approved by the Ethics  
135 Committee of the Medical Faculty of the RWTH Aachen University, Germany. Written informed  
136 consent was obtained from all subjects following the recommendations of the Declaration of  
137 Helsinki.

### 138 **Experimental design**

139  
140           To investigate the effects of task-induced brain activity on the post-task resting-state, the  
141 experiment followed a rest-task-rest (RTR) design consisting of three parts – each part  
142 representing a different brain state: first RS (R1), active state (during the performance of the visual  
143 oddball paradigm) and the second, post-task RS (R2) (Fig 1).

144

145 **Fig 1. Experimental design of the rest-task-rest paradigm (RTR) which includes two**  
146 **resting-state conditions (pre- and post-task resting-state, R1 and R2) and the task**  
147 **condition composed of three subtasks of the visual oddball paradigm (VOP).**

148

149 During RS conditions, the subjects were instructed to close their eyes and not focus on  
150 any specific thoughts. All the fMRI data were acquired in a single scanning session and  
151 instructions were given to the subjects in-between each condition via a microphone.

152

153 The visual oddball paradigm comprises of three subtasks: passive (T1), count (T2), and  
154 respond (T3). Two different colored circles were established as frequent (yellow circles) and target  
155 (blue circles) stimuli. During the passive condition, the subjects were asked to simply keep the  
156 stimuli under observation. During the count condition, the subjects were asked to count the target  
157 stimuli (blue circles), and during the respond condition, the subjects were instructed to press a  
158 button with their right index finger as soon as they recognised the target stimuli.

159 Each visual oddball paradigm condition included 200 trials (160 frequent and 40 target  
160 stimuli). The single stimulus was 30 cm in diameter shown on a black background for  
161 500 milliseconds with a variable interstimulus interval (ISI) of 500–10,000 milliseconds. The  
162 stimulus generator board (ViSaGe MKII, Cambridge Research System Ltd.) was used to generate  
163 the stimuli and a thin-film transistor display was used to view the stimuli. The thin-film  
164 transistor display was installed behind the scanner and was viewed using a mirror placed on the  
165 head coil of the magnetic resonance (MR) scanner.

166 A part of this data set (N = 16), which mainly focused on the analysis of the effects of  
167 different response modalities on the fMRI BOLD activation during the visual oddball paradigm,  
168 has been published previously [51].

## 169 **MR Data Acquisition**

170

171 MR data were acquired using a 3T scanner (TIM-Trio, Siemens Healthineers, Erlangen,  
172 Germany). Sponge pads were used to reduce motion artefacts by limiting the subject's head  
173 movement. The fMRI data were acquired using an echo planner imaging (EPI) sequence. The  
174 number of volumes were 304 for each task and 180 for each RS condition (repetition time (TR) =  
175 2000 ms, echo time (TE) = 30 ms, flip angle (FA) = 79°, field of view (FOV) = 200 × 200 mm, 64  
176 × 64 matrix, slice thickness = 3 mm, number of slices = 33).

177 Structural images were acquired using a magnetization prepared rapid gradient echo (MP-  
178 RAGE) sequence (TR = 2250 ms, TE = 3.03 ms, FA = 9°, FOV = 256 × 265 mm, 64 × 64 matrix,  
179 176 slices, voxel size 1 × 1 × 1 mm<sup>3</sup>).

## 180 **fMRI Data Analysis**

181

### 182 **Task Data**

183

184 The analysis of the task-related brain activation was performed using FSL software  
185 package (FMRIB's Software Library, [www.fmrib.ox.ac.uk/fsl](http://www.fmrib.ox.ac.uk/fsl)). The pre-processing included slice  
186 timing correction, brain extraction (using BET) [52], motion correction (MCFLIRT) [53], spatial  
187 smoothing using a Gaussian kernel of full width at half maximum (FWHM) of 5 mm, and high pass  
188 temporal filtering (100s). A time-series of BOLD signal based on the general linear model for each  
189 individual data set was performed using FILM with local autocorrelation correction [54]. The  
190 functional images were registered to the high-resolution structural images and subsequently to  
191 the Montreal Neurological Institute (MNI) standard space using the FLIRT tool [55]. The first-level  
192 analysis was performed with two explanatory variables (EV). The EVs were convolved with a  
193 double-gamma hemodynamic response function (HRF). Four contrasts were then created: target  
194 stimuli, frequent stimuli, target > frequent, frequent > target.



195 Group-level mixed-effects analysis was performed for the passive, count and respond sub-tasks  
196 to create a mean for each first level contrast using FLAME with spatial normalization to MNI space  
197 and using a cluster with a significance threshold of  $Z > 2.3$ ,  $p = 0.05$  [56]. A tripled two-group  
198 difference (“tripled t-test”) Was performed to evaluate the additional activation added to the  
199 passive condition by the count and respond conditions. The activation pattern regions were  
200 defined using Harvard-Oxford Cortical Structural Atlas in FSL software (FMRIB, Oxford, UK).

## 201 **Triple network identification**

202

203 The multivariate exploratory linear decomposition into independent components  
204 (MELODIC) tool from the FSL software package was used to identify the triple networks (DMN,  
205 CEN, and SN) using pre-task RS fMRI data. Subject level RS-fMRI data were pre-processed as  
206 follows: the first eight fMRI volume images were removed, followed by slice timing correction,  
207 brain extraction (BET) [52], motion correction (MCFLIRT) [53], spatial smoothing FWHM = 5 mm,  
208 and high-pass temporal filtering 125s. The functional MRI images were co-registered linearly to  
209 high-resolution structural images and nonlinearly to MNI standard space using FLIRT [55]. Group  
210 ICA analysis was used to decompose the pre-task RS data into 20 components.

211

212 To identify the triple networks, a cross-correlation was performed between the functional  
213 brain networks atlas [57] and each of the ICA components. The cross-correlation was performed  
214 using the FSLUTILS (<https://fsl.fmrib.ox.ac.uk/fsl/fslwiki/Fslutils>) tool implemented in the FSL  
215 software package. ICA components that showed maximum correlation with each of the three  
216 networks in the functional brain networks atlas were chosen. The identified brain networks were  
217 binarized and used in the subsequent analysis as masks. The binarized masks were corrected  
218 for grey matter (GM) by including the voxels which showed more than 50% probability of being

219 GM. The GM correction was performed using a tissue segmented MNI152 ( $2 \times 2 \times 2 \text{ mm}^3$ )  
220 template.

## 221 **fMRI measures calculation**

222

223 The fMRI measures were computed for both the tasks and RS-fMRI using data processing  
224 and analysis for brain imaging (DPABI) [58], and SPM12 (<http://www.fil.ion.ucl.ac.uk/spm/>)  
225 toolboxes built on MATLAB software package version 2017b (The Math Works, Inc., Natick, MA,  
226 USA). Pre-processing was performed using the data processing assistant for the RS-fMRI  
227 (DPARSF) [59] advanced edition as follows: first eight fMRI volume images of each condition in  
228 each subject's dataset were removed, followed by slice timing correction, realignment, nuisance  
229 covariates regression (NCR) and temporal filtering between 0.01 and 0.08 Hz. To get rid of the  
230 nuisance signals, the Friston 24-parameter model was used for covariate regression. The fMRI  
231 measures were calculated for each subject separately in individual brain imaging space. The DC  
232 was computed by applying a Pearson correlation coefficient between the time series of a given  
233 voxel and all other voxels in the whole brain by thresholding each correlation at ( $r > 0.25$ ,  $p \leq$   
234  $0.001$ ) [60]. ReHo was calculated by estimating the synchronization or similarity between the time  
235 series of a given voxel and 26 nearby neighbor voxels [48] using Kendall's coefficient of  
236 concordance (KCC) [61]. The ALFF was calculated within the low-frequency range (0.01 – 0.1  
237 Hz) [62]. The fMRI measures were normalised using a Z-value standardization procedure by  
238 subtracting the mean from each voxel and then dividing the value by the standard deviation of the  
239 whole brain. The Z-value standardised measures were co-registered to the MNI standard space  
240 ( $2 \times 2 \times 2 \text{ mm}^3$ ), and, finally, spatial smoothing with FWHM at  $4 \text{ mm}^3$  was performed.

241

## 242 **Further calculated values**

243

244 The fMRI measures ALFF, ReHo, and DC were extracted from all voxels of the triple network  
245 for each condition in all subjects using the binarized triple network masks. The extracted voxel-  
246 level values were used to calculate several parameters of interest, relevant for the examination  
247 of the task effect on the post task resting-state. These parameters and the exact description of  
248 how they were calculated are shown in Table 1.

249

250 **Table 1: Description of parameters used to examine the effect of the task on the fMRI**  
251 **measures in the post-task RS**

| <b>Parameter</b>                      | <b>Calculation procedure/ meaning</b>                                                                                                                                                                                         |
|---------------------------------------|-------------------------------------------------------------------------------------------------------------------------------------------------------------------------------------------------------------------------------|
| <b>R1</b>                             | Voxel-level fMRI measures during the first (pre-task) resting-state (RS) (baseline)                                                                                                                                           |
| <b>R2</b>                             | Voxel-level fMRI measures during the second (post-task) RS.                                                                                                                                                                   |
| <b>T1, T2, T3</b>                     | Voxel-level fMRI measures during the three subtasks of the visual oddball paradigm.                                                                                                                                           |
| <b>RS difference (RSD)</b>            | Difference between post- and pre-task RS (R2 - R1) in the voxel-level fMRI measures for each subject.                                                                                                                         |
| <b>Task<sub>(whole)</sub></b>         | $\text{Task}_{(\text{whole})} = (T1 + T2 + T3) / 3$<br>(mean values of the fMRI measures during the three subtasks)                                                                                                           |
| <b>Main task<sub>(whole)</sub></b>    | $\text{Task}_{(\text{whole})} - R1$                                                                                                                                                                                           |
| <b>RS similarity (RSS)</b>            | Correlation coefficient between R1 and R2 for each subject.                                                                                                                                                                   |
| <b>Task effect at the group level</b> | Correlation coefficients between the differences (Task <sub>(whole)</sub> – R1) and (R2 - R1).<br>All correlation coefficients were computed using Pearson's correlation coefficients at a significance level of $p < 0.05$ . |

252

253 The inter-network FC of the three networks were calculated by first extracting the mean of  
254 the BOLD signal time series from the binarized mask of each network, followed by the

255 computation of the Pearson's correlation coefficient between each pair of networks. Fisher  $r$  to  $z$   
256 transformation was performed to improve the normal distribution. A paired t-test was used to  
257 examine the difference of FC between the pre- and the post-task RS.

258

259 To investigate the relationship between the behavioral data (e.g. reaction time) and the  
260 fMRI measures, the correlation coefficients between the RSD and subject's reaction time in the  
261 response condition was performed. Having checked the normality of the data using the  
262 Kolmogorov-Smirnov test, a paired-sample t-test was used in order to find the differences  
263 between the pre- and post-task RS in each fMRI measure.

## 264 **Results**

### 265 **Behavioural data**

266

267 The mean reaction time of the respond condition was 477ms (SD = 13).

### 268 **Imaging data - task data**

269

270 The task data were initially analysed and reported following the examination of the first 16  
271 participants [51]. The current analysis includes an enlarged collective of test subjects (N = 21)  
272 and confirms previously reported findings. In summary, activation in regions associated with a  
273 response to visual stimulation (occipital cortex) for both the target and the frequent stimuli was  
274 observed during all three subtasks of the visual oddball paradigm. Both, the count and respond  
275 conditions differed significantly from the passive condition in a number of brain regions including  
276 the pre- and post-central gyri, regions of the parietal cortex and the middle and inferior frontal  
277 gyri. Compared to the count condition, the response contrast yielded significant differences in the  
278 parietal operculum, inferior parietal lobule, insula, anterior cingulate cortex, and the posterior  
279 cingulate cortex (PCC).

280

## 281 **Imaging data -Triple network resting-state data**

282

283           The triple network was identified using group independent component analysis (Fig 2).  
284 Specifically, the DMN included the posterior cingulate cortex (PCC), precuneus, angular gyrus,  
285 and medial prefrontal cortex (mPFC); the CEN included the lateral posterior parietal cortex  
286 (LPPC) and dorsolateral prefrontal cortex (DLPFC); the SN included the frontal insular cortex  
287 (FIC), and anterior cingulate cortex (ACC).

288

289 **Fig 2. Depiction of the triple networks referred to as the triple network: default mode**  
290 **network (DMN, blue colour), central executive network (CEN, red colour), and salience**  
291 **network (SN, green colour). The networks were identified by decomposing the pre-task**  
292 **resting-state condition into 20 components from 21 subjects.**

293

## 294 **RSA and FC across different brain-states**

295

296           The fMRI measures showed different values in the RSA and the local and global FC during  
297 the different brain-states (rest-task-rest) (Fig 3). These values differed significantly at the group  
298 level. A pairwise comparison between the pre- and post-task RS (R1 and R2) revealed significant  
299 differences in each network and for each fMRI measure at a significance level of  $p < 0.05$ , with  
300 exception of the ReHo measure in the SN (Table 2).

301

302 **Fig 3. fMRI measures (ALFF, ReHo, and DC) from 21 subjects. Visual inspection shows a**  
303 **change in each of the three fMRI measures in the post-task resting-state (R2) when**  
304 **compared to pre-task resting-state networks (R1). The differences between R1 and R2 were**

305 **significant in each network and in each fMRI measure at significance level  $p < 0.05$ , with**  
 306 **exception of the ReHo measure in the salience network (SN).**

307

308 **Table 2. A paired-samples t-test was performed to compare the pre-task resting-state (R1)**  
 309 **and post-task resting-state (R2) conditions in the triple network (default mode network**  
 310 **(DMN), salience network (SN), and central executive network (CEN)), in each fMRI**  
 311 **measurement (21 Subjects). There was a significant difference of  $p < 0.05$  between R1 and**  
 312 **R2 in each network and in each fMRI measurement, with the exception of the SN from the**  
 313 **ReHo measurement.**

| <b>Brain network</b>                                  | <b>Mean values in R1</b> | <b>Standard deviation of values in R1</b> | <b>Mean values in R2</b> | <b>Standard deviation of values in R2</b> | <b>P-Value</b> | <b>T-Value</b> |
|-------------------------------------------------------|--------------------------|-------------------------------------------|--------------------------|-------------------------------------------|----------------|----------------|
| <b>Amplitude of low frequency fluctuations (ALFF)</b> |                          |                                           |                          |                                           |                |                |
| DMN                                                   | 0.1935                   | 0.3429                                    | 0.1120                   | 0.3344                                    | 0.0000         | 22.33          |
| CEN                                                   | 0.1592                   | 0.3690                                    | 0.0420                   | 0.3569                                    | 0.0000         | 20.92          |
| SN                                                    | -0.0475                  | 0.3207                                    | -0.0787                  | 0.3151                                    | 0.0000         | 10.17          |
| <b>Regional homogeneity (ReHo)</b>                    |                          |                                           |                          |                                           |                |                |
| DMN                                                   | 0.8096                   | 0.6722                                    | 0.8333                   | 0.6511                                    | 0.0161         | 2.40           |
| CEN                                                   | 0.7172                   | 0.5942                                    | 0.5955                   | 0.6045                                    | 0.0000         | 9.01           |
| SN                                                    | 0.0936                   | 0.4972                                    | 0.0809                   | 0.4908                                    | 0.1431         | 1.46           |
| <b>Degree centrality (DC)</b>                         |                          |                                           |                          |                                           |                |                |
| DMN                                                   | 0.1278                   | 0.3705                                    | 0.1154                   | 0.3628                                    | 0.0280         | 2.19           |
| CEN                                                   | 0.2673                   | 0.3669                                    | 0.2231                   | 0.3295                                    | 0.0000         | 5.69           |

|    |        |        |        |        |        |      |
|----|--------|--------|--------|--------|--------|------|
| SN | 0.0276 | 0.3269 | 0.0726 | 0.3250 | 0.0000 | 9.71 |
|----|--------|--------|--------|--------|--------|------|

314

315           Concretely, the ALFF values decreased significantly in all three observed networks ( $p <$   
316 0.001 in all three networks). For the local connectivity parameter (ReHo), a significant increase in  
317 the DMN ( $p = 0.016$ ) was observed, while the ReHo value decreased in the CEN ( $p < 0.001$ ) and  
318 remained without statistically significant alteration in the SN. The long-range connectivity (DC)  
319 decreased significantly in the DMN and CEN ( $p = 0.028$ ;  $p < 0.001$ ), while increasing in the SN ( $p$   
320  $< 0.001$ ).

321

## 322 **Associations between the pre- and post-task resting-state** 323 **differences and the task**

324

325           The RSS values were calculated separately for the triple networks (DMN, CEN and SN)  
326 for each of the fMRI measures (ALFF; ReHo and DC) are shown in Table 3. The RSS values  
327 were comparable for all three parameters across all three networks.

328

329 **Table 3. Mean values, standard deviation, and the range of the resting-state similarity**  
330 **(RSS) calculated separately for each resting-state fMRI parameter (ALFF, ReHo, and DC)**  
331 **and for each of the triple networks (default mode network (DMN), salience network (SN),**  
332 **and central executive network (CEN)).**

|      | RSS<br>(Mean) | RSS<br>(SD) | RSS<br>(Range) |
|------|---------------|-------------|----------------|
| DMN  |               |             |                |
| ALFF | 0.8818        | 0.029       | 0.824 – 0.925  |
| ReHo | 0.8118        | 0.039       | 0.698 - 0.876  |

|      |        |        |               |
|------|--------|--------|---------------|
| DC   | 0.7563 | 0.0657 | 0.575 - 0.884 |
| CEN  |        |        |               |
| ALFF | 0.8736 | 0.044  | 0.763 - 0.946 |
| ReHo | 0.7788 | 0.051  | 0.655 - 0.867 |
| DC   | 0.7574 | 0.097  | 0.425 - 0.864 |
| SN   |        |        |               |
| ALFF | 0.8855 | 0.048  | 0.721 - 0.934 |
| ReHo | 0.7583 | 0.045  | 0.664 - 0.851 |
| DC   | 0.7561 | 0.083  | 0.498 - 0.880 |

333

334

335 The correlation between the differences between post-task and pre-task RS parameters  
336 (RSD = R2 - R1) and the fMRI measures resulting from the pure task effects ( $\text{task}_{(\text{whole})} - R1$ ) are  
337 depicted in (Fig 4). Significant positive correlations were found in DMN for ALFF ( $r = 0.48$ ,  $p =$   
338  $0.02$ ) and DC ( $r = 0.58$ ,  $p = 0.005$ ); in CEN for ALFF ( $r = 0.44$ ,  $p = 0.04$ ), ReHo ( $r = 0.69$ ,  $p =$   
339  $0.004$ ) and DC ( $r = 0.67$ ,  $p = 0.008$ ); and in SN for ALFF ( $r = 0.69$ ,  $p = 0.004$ ), ReHo ( $r = 0.58$ ,  $p$   
340  $= 0.004$ ), and DC ( $r = 0.49$ ,  $p = 0.02$ ).

341

342 **Fig 4. Correlations between the fMRI measures resulting from the pure  $\text{task}_{(\text{whole})}$  effects**  
343 **and the RSD in the triple network, including the DMN, CEN, and SN of the fMRI measures.**

344

345 Further, a significant negative correlation was observed between the RS differences  
346 (RSD) in DC and the subject's reaction time in the respond condition in the SN ( $r = -0.46$ ,  $p =$



347 0.04), but not in ReHo or ALFF measurements. No significant correlations between the fMRI  
348 measurements and the reaction time could be observed in DMN and CEN (Fig 5).

349

350 **Fig 5. Correlation between the resting-state differences (RSD) and the subject's reaction**  
351 **time to the respond condition of the VOP, depicted in the triple networks and each fMRI**  
352 **measurement. Only the SN shows a significant negative correlation in the DC**  
353 **measurement.**

354

## 355 **Inter-network interaction**

356

357 The functional connectivity between the DMN and CEN increased significantly following  
358 the performance of the task ( $p = 0.015$ ). The connectivity strength between the DMN and the SN  
359 remained stable ( $p = 0.25$ ), whereas it increased significantly between the SN and CEN ( $p =$   
360  $0.0004$ ) (Fig 6).

361

362 **Fig 6. Strength of the FC between each pair of networks in the triple network in the pre-**  
363 **and post-task resting-state. There is a significant increase in FC between the DMN and**  
364 **CEN, and between the CEN and the SN in the post-task resting-state ( $p < 0.05$ ). The bars**  
365 **represent the standard error.**

366

367

368

## 369 Discussion

370 In this study, we investigated the effects of a simple visual-oddball paradigm on three  
371 basic fMRI measurements of the RS – ALFF (RSA), ReHo, and DC (the local and the global  
372 functional connectivity, respectively) - in the three networks - DMN, CEN, and SN. Our analysis  
373 revealed that the brain activity following completion of the task had a significant effect on all  
374 examined parameters in all networks, except for the measure of local connectivity (ReHo) in the  
375 SN. Furthermore, the task performance induced a significant increase in the inter-network  
376 correlations between the SN and CEN, as well as between the DMN and CEN, but not between  
377 the DMN and SN. Also, the differences between the pre- and the post-task RS ( $R_2 - R_1$ ) were  
378 strongly associated with the main task influence ( $\text{task}_{(\text{Whole})} - R_1$ ) in all three networks (ALFF and  
379 DC in the three networks, ReHo in the CEN and SN). Finally, at a behavioral level, the task  
380 performance (subject's reaction time in the respond condition) correlated solely with the RS  
381 difference in DC for the SN.

382

383 Our findings indicate dynamic, disparate alterations in the post-task resting-state brain  
384 networks as a function of immediately preceding cognitive experiences. Thereby, the extent of  
385 the changes in the RS networks can be said to be closely associated with the magnitude of the  
386 direct task-effects measurable during the task performance.

387

388 Within the DMN, the ALFF values decreased significantly, indicating a reduction of the DMN RSA  
389 following task performance. This effect has been reported previously [63-65]. As the DMN is  
390 regularly deactivated during the task performance [66,67], the continued reduction of the RSA  
391 observed after the task could be an expression of a redistribution of cognitive resources in the  
392 subsequent rest phase but could also indicate a neuronal correlate of task-induced temporal  
393 fatigue after a cognitive engagement [64]. In our study, the ALFF decrease in the DMN was

394 accompanied by a decrease in DC. Similar findings have been previously reported after subjects  
395 performed a sustained auditory working memory task [65]. Interestingly, the local FC (ReHo)  
396 increased significantly in the DMN. Local FC is defined by the temporal coherence or  
397 synchronization of the BOLD time series within a set of a given voxel's nearest neighbors [26].  
398 ReHo represents the most efficient, reliable, and widely used index of local FC [68,69]. An  
399 increase in ReHo indicates an increased local synchronization of spontaneous neural activity [65].  
400 Moreover, it was previously postulated that ReHo correlates with measures of functional  
401 segregation such as local efficiency and clustering coefficients [70]. Thus, increased ReHo in the  
402 DMN following task completion may reflect a restriction of information transfer to spatially close  
403 areas, as well as functional segregation from distant hubs and decreased communication with  
404 remote brain regions [71]. This result complements the observation of the decreased DC values  
405 in the post-task RS in DMN.

406

407         A significant increase in global brain connectivity (DC) was found in the SN in the post-  
408 task RS. This finding is in concordance with the established role of the SN as a network known to  
409 demonstrate competitive interactions during cognitive information processing [6,19] and, thus,  
410 having a critical role in switching between two other major RS networks (the DMN and the CEN  
411 [1]. In particular, the main hubs of the SN, the frontal inferior insula and ACC, are known to share  
412 significant topographic reciprocal connectivity and form a tightly coupled network, ideally placed  
413 to integrate information from several brain regions [72,73]. Thus, they seem to moderate arousal  
414 during cognitively demanding tasks and play a unique function in initiating control signals that  
415 activate the CEN and deactivate the DMN [74].

416

417         The finding of a significant decrease of the RSA (ALFF) in the post-task RS in SN is slightly  
418 more complex to explain. Previous investigations have linked increased ALFF values in some

419 parts of the SN to a hyperarousal state in patients with MDD [75]. The reduction of the RSA in the  
420 post-task RS in our study may be an expression of a decreased arousal and decreased stimulus  
421 monitoring immediately after a completion of a task.

422 The connectivity analysis between the three networks revealed an increased  
423 synchronization (in terms of a significantly increased connectivity strength) for the SN with the  
424 CEN but not with the DMN in the post-task RS compared to the pre-task RS. This may be an  
425 after-task of the inter-network interactions during the paradigm performance. Indeed, Sridharan  
426 and colleagues have shown that the connectivity strength during the visual oddball paradigm  
427 particularly increased between the main nodes of the SN (frontal anterior insula and ACC) and all  
428 main nodes of the CEN, while the interactions between the SN and DMN were less pronounced  
429 [74].

430 In the CEN, the spontaneous brain activity (ALFF) decreased alongside the measures of  
431 the local and global connectivity. At a broad level, the CEN is included in higher order executive  
432 functioning, including the cognitive control of thought, emotion regulation, and working memory  
433 [16,76,77] and is thus activated during efforts to exert self-control, reappraise threatening stimuli,  
434 and to suppress intrusive, unpleasant thoughts [78-80]. CEN activity has been shown to be anti-  
435 correlated with activity in the DMN in healthy adults [1,19,74], while some investigations indicate  
436 that the CEN also exhibits an inhibitory control on the DMN [81]. Thus, the decrease in RSA in  
437 the CEN following completion of a cognitive paradigm may be the basis for the restoration of the  
438 regular activity of the DMN within the scope of a decline in DMN inhibition which occurred as a  
439 result of increased CEN activity during the task performance.

440 Interestingly, the connectivity between the CEN and DMN also increased in the post-task  
441 resting-state. This finding is consistent with the literature on the cooperative activity of the DMN  
442 and the CEN during different mental operations [82]. An increased coupling between some parts

443 of these two networks has been shown in problem-solving tasks [83], social working memory [84],  
444 and during creative idea production [85]. Furthermore, a significant interaction between the DMN  
445 and the CEN has also been shown during the RS condition [86]. Thereby, this interaction seems  
446 to fluctuate dynamically across short time scales [87], indicating that the temporal relationships  
447 between the DMN and CEN shifts depending on the change in the attention focus and the  
448 immediately preceding activity. Thus, the increased connectivity between the DMN and the CEN  
449 in the post-task RS observed in our study may be an expression of the shifting of attention after  
450 task completion.

451

452 Several subregions of the triple networks are known to be activated during the  
453 performance of cognitively demanding tasks [88]. In the case of the visual oddball paradigm  
454 performed in our study, the main task specific activation has been reported previously by Warbrick  
455 and colleagues [51]. The target detection specifically involved parts of the DMN (PCC) and the  
456 SN (Insula, ACC). The insula activation was common to the count and respond conditions. The  
457 intensive involvement of different subregions of the triple networks in the performance of the task  
458 may have contributed to the significant changes in the triple network model networks in the post-  
459 task RS compared to the pre-task RS. Indeed, we have found positive correlations between the  
460 extent of the differences between R1 and R2 regarding specific parameters and the actual task  
461 effect on the same parameters in the triple networks. These correlations were significant in the  
462 DMN for ALFF and DC measures and in the CEN and the SN for all three fMRI measures. A close  
463 relationship between the cognitive level of the previous task and the extent of the modulation in  
464 the brain networks has been reported previously. Barnes and colleagues observed that the  
465 changes in endogenous dynamics in post-task RS is directly related to the difficulty of task  
466 performance [89]. In the case of the visual oddball paradigm used here, the levels of cognitive  
467 demand for all the three subtasks are not widely different and the whole paradigm did not require

468 high cognitive effort. However, we observed that the extent of the changes in the RSA and local  
469 as well as global connectivity in the core RS networks in the post-task condition follows the extent  
470 of the task-induced changes within those networks. Thus, the task-induced modification of the RS  
471 activity and connectivity seems to be influenced by the intensity of the immediately preceding  
472 activation within the observed regions/networks.

473

474 A significant correlation between the behavioral outcomes in the visual oddball paradigm  
475 and the changes in the fMRI parameters could only be observed in the SN. Participants showing  
476 better performance (shorter response times in the response subtask) had a higher increase in  
477 global connectivity when comparing the second and the first RS. Thus, higher flexibility of the SN  
478 may be associated with better cognitive performance. This supports the observation that subjects  
479 with lower SN-network interactions have more pronounced inattention scores [90].

480

## 481 **Conclusion**

482 Our findings confirm significant dynamical changes in RSA, alongside local and global  
483 connectivity within the triple networks following a simple cognitive activity. As discussed above,  
484 the change in patterns differed noticeably between the networks and was tightly associated with  
485 the task-related brain activity. The observed changes may be an expression of the distinct  
486 involvement of the networks in the performance of the task and their various roles in the  
487 processing and integration of the immediately preceding experience. Our results provide further  
488 insight into the dynamics within and between the triple networks and contribute to a better  
489 understanding of their functional importance and interplay.

## 490 **Acknowledgements**

491 This study is considered to be part of the doctoral thesis (Dr. rer. medic.) of Mr. Hasan Sbaihat,  
492 Faculty of Medicine, RWTH Aachen University, Germany. Hasan Sbaihat would like to thank the  
493 Palestinian German Science Bridge (PGSB), Federal Ministry of Education and Research  
494 Germany, and the Palestine Academy for Science and Technology (PALAST) for their assistance  
495 and scholarship funding. The authors would like to thank Dr. Jorge Arrubla and Tracy Warbrick  
496 for their help in data acquisition, and Dr. Shivakumar Viswanathan for providing advice on  
497 statistics. Finally, authors would like to thank Ms. Claire Rick and Mr. Dennis Thomas for  
498 proofreading the manuscript.

499

## 500 **References**

501

- 502 1. Menon V, Uddin LQ. Saliency, switching, attention and control: a network model of insula  
503 function. *Brain Struct Funct*. 2010 May 29;214(5–6):655–67. doi: 10.1007/s00429-010-  
504 0262-0
- 505 2. Menon V. Large-scale brain networks and psychopathology: a unifying triple network model.  
506 *Trends in Cognitive Sciences*. 2011 Oct;15(10):483–506. doi: 10.1016/j.tics.2011.08.003
- 507 3. Wu X, Li Q, Yu X, Chen K, Fleisher AS, Guo X, et al. A Triple Network Connectivity Study of  
508 Large-Scale Brain Systems in Cognitively Normal APOE4 Carriers. *Front Aging Neurosci*.  
509 2016 Sep 28;8. doi: 10.3389/fnagi.2016.00231
- 510 4. Krishnadas R, Ryali S, Chen T, Uddin L, Supekar K, Palaniyappan L, et al. Resting state  
511 functional hyperconnectivity within a triple network model in paranoid schizophrenia. *The*  
512 *Lancet*. 2014 Feb;383:S65. doi: 10.1016/S0140-6736(14)60328-7
- 513 5. Lin P, Yang Y, Gao J, De Pisapia N, Ge S, Wang X, et al. Dynamic Default Mode Network  
514 across Different Brain States. *Sci Rep*. 2017 Apr 6;7(1). doi: 10.1038/srep46088

- 515 6. Greicius MD, Krasnow B, Reiss AL, Menon V. Functional connectivity in the resting brain: A  
516 network analysis of the default mode hypothesis. *Proceedings of the National Academy*  
517 *of Sciences*. 2002 Dec 27;100(1):253–8. doi: 10.1073/pnas.0135058100
- 518 7. Greicius MD, Menon V. Default-Mode Activity during a Passive Sensory Task: Uncoupled  
519 from Deactivation but Impacting Activation. *Journal of Cognitive Neuroscience*. 2004  
520 Nov;16(9):1484–92. doi: 10.1162/0898929042568532
- 521 8. van den Heuvel MP, Sporns O. Network hubs in the human brain. *Trends in Cognitive*  
522 *Sciences*. 2013 Dec;17(12):683–96. doi: 10.1016/j.tics.2013.09.012
- 523 9. Hagmann P, Cammoun L, Gigandet X, Meuli R, Honey CJ, Wedeen VJ, et al. Mapping the  
524 Structural Core of Human Cerebral Cortex. Friston KJ, editor. *PLoS Biol*. 2008 Jul  
525 1;6(7):e159. doi: 10.1371/journal.pbio.0060159
- 526 10. Elton A, Gao W. Task-positive Functional Connectivity of the Default Mode Network  
527 Transcends Task Domain. *Journal of Cognitive Neuroscience*. 2015 Dec;27(12):2369–81.  
528 doi: 10.1162/jocn\_a\_00859
- 529 11. Wang Z, Liu J, Zhong N, Qin Y, Zhou H, Li K. Changes in the brain intrinsic organization in  
530 both on-task state and post-task resting state. *NeuroImage*. 2012 Aug;62(1):394–407.  
531 doi: 10.1016/j.neuroimage.2012.04.051
- 532 12. Li B, Wang X, Yao S, Hu D, Friston K. Task-Dependent Modulation of Effective Connectivity  
533 within the Default Mode Network. *Front Psychology*. 2012;3. doi:  
534 10.3389/fpsyg.2012.00206
- 535 13. Müller NG, Knight RT. The functional neuroanatomy of working memory: Contributions of  
536 human brain lesion studies. *Neuroscience*. 2006 Apr;139(1):51–8. doi:  
537 10.1016/j.neuroscience.2005.09.018
- 538 14. Bressler SL, Menon V. Large-scale brain networks in cognition: emerging methods and  
539 principles. *Trends in Cognitive Sciences*. 2010 Jun;14(6):277–90. doi:



- 540           10.1016/j.tics.2010.04.004
- 541   15. Li Q, Liu J, Wang W, Wang Y, Li W, Chen J, et al. Disrupted coupling of large-scale  
542           networks is associated with relapse behaviour in heroin-dependent men. *jpn*. 2018 Jan  
543           1;43(1):48–57. doi: 10.1503/jpn.170011
- 544   16. Seeley WW, Menon V, Schatzberg AF, Keller J, Glover GH, Kenna H, et al. Dissociable  
545           Intrinsic Connectivity Networks for Salience Processing and Executive Control. *Journal of*  
546           Neuroscience. 2007 Feb 28;27(9):2349–56. doi: 10.1523/JNEUROSCI.5587-06.2007
- 547   17. Goulden N, Khusnulina A, Davis NJ, Bracewell RM, Bokde AL, McNulty JP, et al. The  
548           salience network is responsible for switching between the default mode network and the  
549           central executive network: Replication from DCM. *NeuroImage*]. 2014 Oct;99:180–90.doi:  
550           10.1016/j.neuroimage.2014.05.052
- 551   18. Sridharan D, Levitin DJ, Menon V. A critical role for the right fronto-insular cortex in  
552           switching between central-executive and default-mode networks. *Proceedings of the*  
553           National Academy of Sciences. 2008 Aug 22;105(34):12569–74. doi:  
554           10.1073/pnas.0800005105
- 555   19. Fox MD, Snyder AZ, Vincent JL, Corbetta M, Van Essen DC, Raichle ME. From The Cover:  
556           The human brain is intrinsically organized into dynamic, anticorrelated functional  
557           networks. *Proceedings of the National Academy of Sciences*. 2005 Jun 23;102(27):9673–  
558           8. doi: 10.1073/pnas.0504136102
- 559   20. Shannon BJ, Raichle ME, Snyder AZ, Fair DA, Mills KL, Zhang D, et al. Premotor functional  
560           connectivity predicts impulsivity in juvenile offenders. *Proceedings of the National*  
561           Academy of Sciences. 2011 Jun 27;108(27):11241–5. doi: 10.1073/pnas.1108241108
- 562   21. Chand GB, Dhamala M. Interactions Among the Brain Default-Mode, Salience, and Central-  
563           Executive Networks During Perceptual Decision-Making of Moving Dots. *Brain*  
564           Connectivity. 2016 Apr;6(3):249–54. doi: 10.1089/brain.2015.0379

- 565 22. Zheng H, Xu L, Xie F, Guo X, Zhang J, Yao L, et al. The Altered Triple Networks Interaction  
566 in Depression under Resting State Based on Graph Theory. *BioMed Research*  
567 *International* [Internet]. 2015;2015:1–8. doi: 10.1155/2015/386326
- 568 23. Liu Y, Li L, Li B, Feng N, Li L, Zhang X, et al. Decreased Triple Network Connectivity in  
569 Patients with Recent Onset Post-Traumatic Stress Disorder after a Single Prolonged  
570 Trauma Exposure. *Sci Rep*. 2017 Oct 3;7(1). doi: 10.1038/s41598-017-12964-6
- 571 24. Fan J, Zhong M, Gan J, Liu W, Niu C, Liao H, et al. Altered connectivity within and between  
572 the default mode, central executive, and salience networks in obsessive-compulsive  
573 disorder. *Journal of Affective Disorders*. 2017 Dec;223:106–14. doi:  
574 10.1016/j.jad.2017.07.041
- 575 25. Manoliu A, Riedl V, Zherdin A, Mühlau M, Schwerthöffer D, Scherr M, et al. Aberrant  
576 Dependence of Default Mode/Central Executive Network Interactions on Anterior Insular  
577 Salience Network Activity in Schizophrenia. *Schizophrenia Bulletin*. 2013 Mar  
578 21;40(2):428–37. doi: 10.1093/schbul/sbt037
- 579 26. Jiang L, Zuo X-N. Regional Homogeneity. *Neuroscientist*. 2016 Jul 9;22(5):486–505. doi:  
580 10.1177/1073858415595004
- 581 27. Menon B. Towards a new model of understanding – The triple network, psychopathology  
582 and the structure of the mind. *Medical Hypotheses*. 2019 Dec;133:109385. doi:  
583 10.1016/j.mehy.2019.109385
- 584 28. Imperatori C, Massullo C, Carbone GA, Panno A, Giacchini M, Capriotti C, et al. Increased  
585 Resting State Triple Network Functional Connectivity in Undergraduate Problematic  
586 Cannabis Users: A Preliminary EEG Coherence Study. *Brain Sciences*. 2020 Feb  
587 28;10(3):136. doi: 10.3390/brainsci10030136
- 588 29. Sakoğlu Ü, Pearlson GD, Kiehl KA, Wang YM, Michael AM, Calhoun VD. A method for  
589 evaluating dynamic functional network connectivity and task-modulation: application to

- 590           schizophrenia. *Magn Reson Mater Phy*. 2010 Feb 17;23(5–6):351–66. doi:  
591           10.1007/s10334-010-0197-8
- 592 30. Bassett DS, Wymbs NF, Porter MA, Mucha PJ, Carlson JM, Grafton ST. Dynamic  
593           reconfiguration of human brain networks during learning. *Proceedings of the National*  
594           *Academy of Sciences* [Internet]. 2011 Apr 18;108(18):7641–6. doi:  
595           10.1073/pnas.1018985108
- 596 31. Albert NB, Robertson EM, Miall RC. The Resting Human Brain and Motor Learning. *Current*  
597           *Biology*. 2009 Jun;19(12):1023–7. doi: 10.1016/j.cub.2009.04.028
- 598
- 599 32. Lewis CM, Baldassarre A, Committeri G, Romani GL, Corbetta M. Learning sculpts the  
600           spontaneous activity of the resting human brain. *Proceedings of the National Academy of*  
601           *Sciences*. 2009 Oct 5;106(41):17558–63. doi: 10.1073/pnas.0902455106
- 602 33. Stevens WD, Buckner RL, Schacter DL. Correlated Low-Frequency BOLD Fluctuations in  
603           the Resting Human Brain Are Modulated by Recent Experience in Category-Preferential  
604           Visual Regions. *Cerebral Cortex*. 2009 Dec 21;20(8):1997–2006. doi:  
605           10.1093/cercor/bhp270
- 606 34. Taubert M, Lohmann G, Margulies DS, Villringer A, Ragert P. Long-term effects of motor  
607           training on resting-state networks and underlying brain structure. *NeuroImage*. 2011  
608           Aug;57(4):1492–8. doi: 10.1016/j.neuroimage.2011.05.078
- 609 35. Sami S, Robertson EM, Miall RC. The Time Course of Task-Specific Memory Consolidation  
610           Effects in Resting State Networks. *Journal of Neuroscience*. 2014 Mar 12;34(11):3982–  
611           92. doi: 10.1523/JNEUROSCI.4341-13.2014
- 612 36. Hartzell JF, Tobia MJ, Davis B, Cashdollar NM, Hasson U. Differential lateralization of  
613           hippocampal connectivity reflects features of recent context and ongoing demands: An  
614           examination of immediate post-task activity. *Hum Brain Mapp*. 2014 Oct 8;36(2):519–37.

- 615           doi: 10.1002/hbm.22644
- 616 37. Gregory MD, Agam Y, Selvadurai C, Nagy A, Vangel M, Tucker M, et al. Resting state  
617           connectivity immediately following learning correlates with subsequent sleep-dependent  
618           enhancement of motor task performance. *NeuroImage* [Internet]. 2014 Nov;102:666–73.  
619           doi: 10.1016/j.neuroimage.2014.08.044
- 620 38. Squires NK, Squires KC, Hillyard SA. Two varieties of long-latency positive waves evoked  
621           by unpredictable auditory stimuli in man. *Electroencephalography and Clinical*  
622           *Neurophysiology*. 1975 Apr;38(4):387–401. doi: 10.1016/0013-4694(75)90263-1  
623
- 624 39. Bledowski C. Localizing P300 Generators in Visual Target and Distractor Processing: A  
625           Combined Event-Related Potential and Functional Magnetic Resonance Imaging Study.  
626           *Journal of Neuroscience*. 2004 Oct 20;24(42):9353–60. doi: 10.1523/JNEUROSCI.1897-  
627           04.2004
- 628 40. Gur RC, Turetsky BI, Loughhead J, Waxman J, Snyder W, Ragland JD, et al. Hemodynamic  
629           responses in neural circuitries for detection of visual target and novelty: An event-related  
630           fMRI study. *Hum Brain Mapp*. 2007;28(4):263–74. doi: 10.1002/hbm.20319
- 631 41. Kiehl KA, Stevens MC, Laurens KR, Pearson G, Calhoun VD, Liddle PF. An adaptive  
632           reflexive processing model of neurocognitive function: supporting evidence from a large  
633           scale (n = 100) fMRI study of an auditory oddball task. *NeuroImage*. 2005 Apr;25(3):899–  
634           915. doi: 10.1016/j.neuroimage.2004.12.035
- 635 42. Strobel A, Debener S, Sorger B, Peters JC, Kranczioch C, Hoechstetter K, et al. Novelty and  
636           target processing during an auditory novelty oddball: A simultaneous event-related  
637           potential and functional magnetic resonance imaging study. *NeuroImage*. 2008  
638           Apr;40(2):869–83. doi: 10.1016/j.neuroimage.2007.10.065
- 639 43. Warbrick T, Mobascher A, Brinkmeyer J, Musso F, Richter N, Stoecker T, et al. Single-trial

- 640 P3 amplitude and latency informed event-related fMRI models yield different BOLD  
641 response patterns to a target detection task. *NeuroImage*. 2009 Oct;47(4):1532–44. doi:  
642 10.1016/j.neuroimage.2009.05.082
- 643 44. Linden DEJ. The Functional Neuroanatomy of Target Detection: An fMRI Study of Visual  
644 and Auditory Oddball Tasks. *Cerebral Cortex*. 1999 Dec 1;9(8):815–23. doi:  
645 10.1093/cercor/9.8.815
- 646 45. McCarthy G, Luby M, Gore J, Goldman-Rakic P. Infrequent Events Transiently Activate  
647 Human Prefrontal and Parietal Cortex as Measured by Functional MRI. *Journal of*  
648 *Neurophysiology*. 1997 Mar 1;77(3):1630–4. doi: 10.1152/jn.1997.77.3.1630
- 649 46. Yoshiura T, Zhong J, Shibata DK, Kwok WE, Shrier DA, Numaguchi Y. Functional MRI  
650 study of auditory and visual oddball tasks. *NeuroReport*. 1999 Jun;10(8):1683–8. doi:  
651 10.1097/00001756-199906030-00011
- 652 47. Halgren E, Marinkovic K, Chauvel P. Generators of the late cognitive potentials in auditory  
653 and visual oddball tasks. *Electroencephalography and Clinical Neurophysiology*. 1998  
654 Feb;106(2):156–64. doi: 10.1016/s0013-4694(97)00119-3
- 655 48. Zang Y, Jiang T, Lu Y, He Y, Tian L. Regional homogeneity approach to fMRI data analysis.  
656 *NeuroImage*. 2004 May;22(1):394–400. doi: 10.1016/j.neuroimage.2003.12.030
- 657 49. Zuo X-N, Ehmke R, Mennes M, Imperati D, Castellanos FX, Sporns O, et al. Network  
658 Centrality in the Human Functional Connectome. *Cerebral Cortex*. 2011 Oct  
659 2;22(8):1862–75. doi: 10.1093/cercor/bhr269
- 660 50. Yu-Feng Z, Yong H, Chao-Zhe Z, Qing-Jiu C, Man-Qiu S, Meng L, et al. Altered baseline  
661 brain activity in children with ADHD revealed by resting-state functional MRI. *Brain and*  
662 *Development*. 2007 Mar;29(2):83–91. doi: 10.1016/j.braindev.2006.07.002
- 663 51. Warbrick T, Reske M, Shah NJ. Do EEG paradigms work in fMRI? Varying task demands in  
664 the visual oddball paradigm: Implications for task design and results interpretation.

- 665           NeuroImage. 2013 Aug;77:177–85. doi: 10.1016/j.neuroimage.2013.03.026
- 666   52. Smith SM. Fast robust automated brain extraction. Hum Brain Mapp. 2002 Nov;17(3):143–
- 667           55. doi: 10.1002/hbm.10062
- 668   53. Jenkinson M, Bannister P, Brady M, Smith S. Improved Optimization for the Robust and
- 669           Accurate Linear Registration and Motion Correction of Brain Images. NeuroImage. 2002
- 670           Oct;17(2):825–41. doi: 10.1006/nimg.2002.1132
- 671   54. Woolrich MW, Ripley BD, Brady M, Smith SM. Temporal Autocorrelation in Univariate Linear
- 672           Modeling of fMRI Data. NeuroImage. 2001 Dec;14(6):1370–86. doi:
- 673           10.1006/nimg.2001.0931
- 674   55. Jenkinson M, Smith S. A global optimisation method for robust affine registration of brain
- 675           images. Medical Image Analysis. 2001 Jun;5(2):143–56. doi: 10.1016/s1361-
- 676           8415(01)00036-6
- 677   56. Woolrich MW, Behrens TEJ, Beckmann CF, Jenkinson M, Smith SM. Multilevel linear
- 678           modelling for fMRI group analysis using Bayesian inference. NeuroImage. 2004
- 679           Apr;21(4):1732–47. doi: 10.1016/j.neuroimage.2003.12.023
- 680   57. Shirer WR, Ryali S, Rykhlevskaia E, Menon V, Greicius MD. Decoding Subject-Driven
- 681           Cognitive States with Whole-Brain Connectivity Patterns. Cerebral Cortex. 2011 May
- 682           26;22(1):158–65. doi: 10.1093/cercor/bhr099
- 683   58. Yan C-G, Wang X-D, Zuo X-N, Zang Y-F. DPABI: Data Processing & Analysis for (Resting-
- 684           State) Brain Imaging. Neuroinform. 2016 Apr 13;14(3):339–51. doi: 10.1007/s12021-016-
- 685           9299-4
- 686   59. Yan. DPARSF: a MATLAB toolbox for “pipeline” data analysis of resting-state fMRI. Front
- 687           Syst Neurosci. 2010. doi: 10.3389/fnsys.2010.00013
- 688   60. Takeuchi H, Taki Y, Nouchi R, Sekiguchi A, Hashizume H, Sassa Y, et al. Degree centrality
- 689           and fractional amplitude of low-frequency oscillations associated with Stroop interference.

- 690           NeuroImage. 2015 Oct;119:197–209. doi: 10.1016/j.neuroimage.2015.06.058
- 691 61. Gideon RA. The Correlation Coefficients. *J Mod App Stat Meth*. 2007 Nov 1;6(2):517–29.
- 692           doi: 10.22237/jmasm/1193890500
- 693 62. Zou Q-H, Zhu C-Z, Yang Y, Zuo X-N, Long X-Y, Cao Q-J, et al. An improved approach to
- 694           detection of amplitude of low-frequency fluctuation (ALFF) for resting-state fMRI:
- 695           Fractional ALFF. *Journal of Neuroscience Methods*. 2008 Jul;172(1):137–41. doi:
- 696           10.1016/j.jneumeth.2008.04.012
- 697 63. McKiernan KA, Kaufman JN, Kucera-Thompson J, Binder JR. A Parametric Manipulation of
- 698           Factors Affecting Task-induced Deactivation in Functional Neuroimaging. *Journal of*
- 699           Cognitive Neuroscience. 2003 Apr 1;15(3):394–408. doi: 10.1162/089892903321593117
- 700 64. Pyka M, Beckmann CF, Schöning S, Hauke S, Heider D, Kugel H, et al. Impact of Working
- 701           Memory Load on fMRI Resting State Pattern in Subsequent Resting Phases. Lauwereyns
- 702           J, editor. *PLoS ONE*. 2009 Sep 25;4(9):e7198. doi: 10.1371/journal.pone.0007198
- 703 65. Tommasin S, Mascali D, Gili T, Eid Assan I, Moraschi M, Fratini M, et al. Task-Related
- 704           Modulations of BOLD Low-Frequency Fluctuations within the Default Mode Network.
- 705           *Front Phys*. 2017 Jul 25;5. doi: 10.3389/fphy.2017.00031
- 706 66. Mason MF, Norton MI, Van Horn JD, Wegner DM, Grafton ST, Macrae CN. Wandering
- 707           Minds: The Default Network and Stimulus-Independent Thought. *Science*. 2007 Jan
- 708           19;315(5810):393–5. doi: 10.1126/science.1131295
- 709 67. Thomason ME, Chang CE, Glover GH, Gabrieli JDE, Greicius MD, Gotlib IH. Default-mode
- 710           function and task-induced deactivation have overlapping brain substrates in children.
- 711           *NeuroImage [Internet]*. 2008 Jul;41(4):1493–503. doi: 10.1016/j.neuroimage.2008.03.029
- 712 68. Zuo X-N, Xu T, Jiang L, Yang Z, Cao X-Y, He Y, et al. Toward reliable characterization of
- 713           functional homogeneity in the human brain: Preprocessing, scan duration, imaging
- 714           resolution and computational space. *NeuroImage*. 2013 Jan;65:374–86. doi:

- 715           10.1016/j.neuroimage.2012.10.017
- 716 69. Zuo X-N, Xing X-X. Test-retest reliabilities of resting-state FMRI measurements in human  
717           brain functional connectomics: A systems neuroscience perspective. *Neuroscience &*  
718           *Biobehavioral Reviews*. 2014 Sep;45:100–18. doi: 10.1016/j.neubiorev.2014.05.009
- 719 70. Lee T-W, Xue S-W. Linking graph features of anatomical architecture to regional brain  
720           activity: A multi-modal MRI study. *Neuroscience Letters*. 2017 Jun;651:123–7. doi:  
721           10.1016/j.neulet.2017.05.005
- 722 71. Respino M, Hoptman MJ, Victoria LW, Alexopoulos GS, Solomonov N, Stein AT, et al.  
723           Cognitive Control Network Homogeneity and Executive Functions in Late-Life  
724           Depression. *Biological Psychiatry: Cognitive Neuroscience and Neuroimaging*. 2020  
725           Feb;5(2):213–21. doi: 10.1016/j.bpsc.2019.10.013
- 726 72. Craig AD. How do you feel? Interoception: the sense of the physiological condition of the  
727           body. *Nat Rev Neurosci*. 2002 Aug;3(8):655–66. doi: 10.1038/nrn894
- 728 73. Critchley HD, Wiens S, Rotshtein P, Öhman A, Dolan RJ. Neural systems supporting  
729           interoceptive awareness. *Nat Neurosci*. 2004 Jan 18;7(2):189–95. doi: 10.1038/nn1176
- 730 74. Sridharan D, Levitin DJ, Menon V. A critical role for the right fronto-insular cortex in  
731           switching between central-executive and default-mode networks. *Proceedings of the*  
732           *National Academy of Sciences*. 2008 Aug 22;105(34):12569–74. doi:  
733           10.1073/pnas.0800005105
- 734 75. Liu C-H, Guo J, Lu S-L, Tang L-R, Fan J, Wang C-Y, et al. Increased Salience Network  
735           Activity in Patients With Insomnia Complaints in Major Depressive Disorder. *Front*  
736           *Psychiatry*. 2018 Mar 20;9. doi: 10.3389/fpsyt.2018.00093
- 737 76. Petrides M. Lateral prefrontal cortex: architectonic and functional organization. *Phil Trans R*  
738           *Soc B*. 2005 Apr 29;360(1456):781–95. doi: 10.1098/rstb.2005.1631
- 739 77. Akiki TJ, Averill CL, Abdallah CG. A Network-Based Neurobiological Model of PTSD:



- 740 Evidence From Structural and Functional Neuroimaging Studies. *Curr Psychiatry Rep.*  
741 2017 Sep 19;19(11). doi: 10.1007/s11920-017-0840-4
- 742 78. Turner BM, Rodriguez CA, Liu Q, Molloy MF, Hoogendijk M, McClure SM. On the Neural  
743 and Mechanistic Bases of Self-Control. *Cerebral Cortex.* 2018 Jan 24;29(2):732–50. doi:  
744 10.1093/cercor/bhx355
- 745 79. Gagnepain P, Hulbert J, Anderson MC. Parallel Regulation of Memory and Emotion  
746 Supports the Suppression of Intrusive Memories. *J Neurosci.* 2017 May 30;37(27):6423–  
747 41. doi: 10.1523/JNEUROSCI.2732-16.2017
- 748 80. Wessing I, Rehbein MA, Postert C, FÜRniss T, Junghöfer M. The neural basis of cognitive  
749 change: Reappraisal of emotional faces modulates neural source activity in a  
750 frontoparietal attention network. *NeuroImage [Internet].* 2013 Nov;81:15–25. doi:  
751 10.1016/j.neuroimage.2013.04.117
- 752 81. Chen AC, Oathes DJ, Chang C, Bradley T, Zhou Z-W, Williams LM, et al. Causal  
753 interactions between fronto-parietal central executive and default-mode networks in  
754 humans. *Proceedings of the National Academy of Sciences.* 2013 Nov  
755 18;110(49):19944–9. doi: 10.1073/pnas.1311772110
- 756 82. Andrews-Hanna JR, Smallwood J, Spreng RN. The default network and self-generated  
757 thought: component processes, dynamic control, and clinical relevance. *Ann NY Acad*  
758 *Sci.* 2014 Feb 6;1316(1):29–52. doi: 10.1111/nyas.12360
- 759 83. Gerlach KD, Spreng RN, Gilmore AW, Schacter DL. Solving future problems: Default  
760 network and executive activity associated with goal-directed mental simulations.  
761 *NeuroImage.* 2011 Apr;55(4):1816–24. doi: 10.1016/j.neuroimage.2011.01.030
- 762 84. Meyer ML, Spunt RP, Berkman ET, Taylor SE, Lieberman MD. Evidence for social working  
763 memory from a parametric functional MRI study. *Proceedings of the National Academy of*  
764 *Sciences.* 2012 Jan 23;109(6):1883–8. doi: 10.1073/pnas.1121077109

- 765 85. Beaty RE, Benedek M, Barry Kaufman S, Silvia PJ. Default and Executive Network Coupling  
766 Supports Creative Idea Production. *Sci Rep*. 2015 Jun 17;5(1). doi: 10.1038/srep10964
- 767 86. Spreng RN, Sepulcre J, Turner GR, Stevens WD, Schacter DL. Intrinsic Architecture  
768 Underlying the Relations among the Default, Dorsal Attention, and Frontoparietal Control  
769 Networks of the Human Brain. *Journal of Cognitive Neuroscience*. 2013 Jan;25(1):74–86.  
770 doi: 10.1162/jocn\_a\_00281
- 771
- 772
- 773 87. Chang C, Glover GH. Time–frequency dynamics of resting-state brain connectivity  
774 measured with fMRI. *NeuroImage*. 2010 Mar;50(1):81–98. doi:  
775 10.1016/j.neuroimage.2009.12.011
- 776 88. Dosenbach NUF, Visscher KM, Palmer ED, Miezin FM, Wenger KK, Kang HC, et al. A Core  
777 System for the Implementation of Task Sets. *Neuron*. 2006 Jun;50(5):799–812. doi:  
778 10.1016/j.neuron.2006.04.031
- 779 89. Barnes A, Bullmore ET, Suckling J. Endogenous Human Brain Dynamics Recover Slowly  
780 Following Cognitive Effort. Brembs B, editor. *PLoS ONE*. 2009 Aug 14;4(8):e6626. doi:  
781 10.1371/journal.pone.0006626
- 782 90. Cai W, Chen T, Szegletes L, Supekar K, Menon V. Aberrant Time-Varying Cross-Network  
783 Interactions in Children With Attention-Deficit/Hyperactivity Disorder and the Relation to  
784 Attention Deficits. *Biological Psychiatry: Cognitive Neuroscience and Neuroimaging*. 2018  
785 Mar;3(3):263–73. doi: 10.1016/j.bpsc.2017.10.005

786

787

788

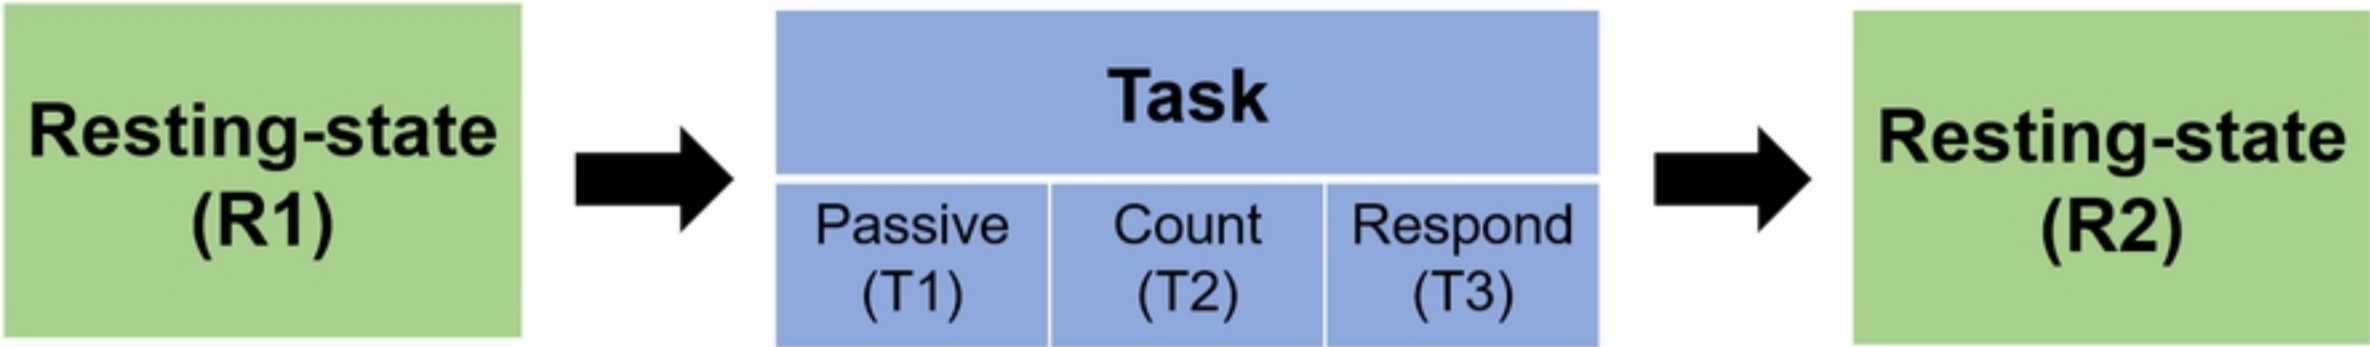

Fig1

**DMN**

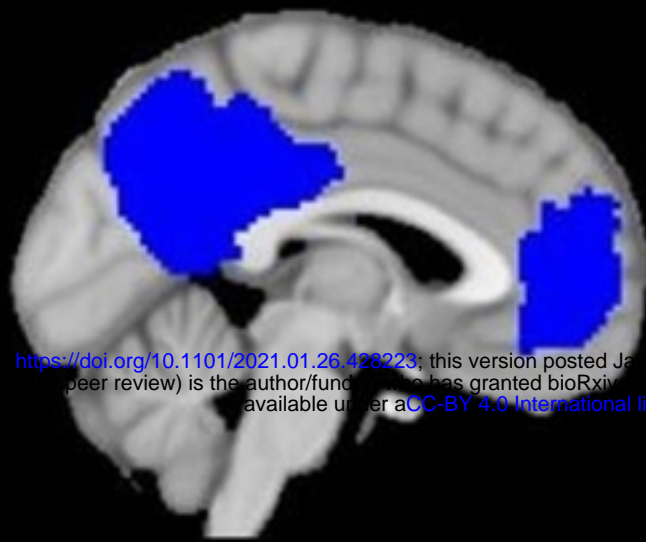

**X = -2**

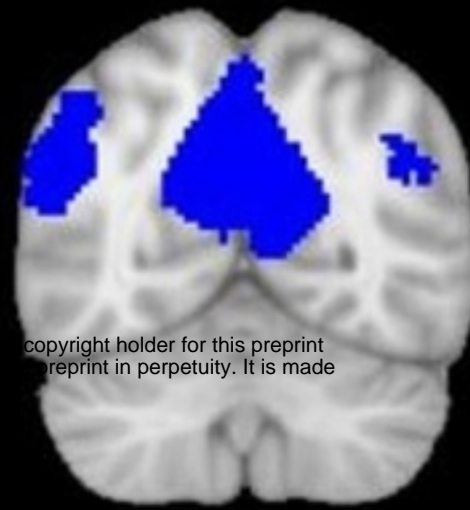

**Y = -61**

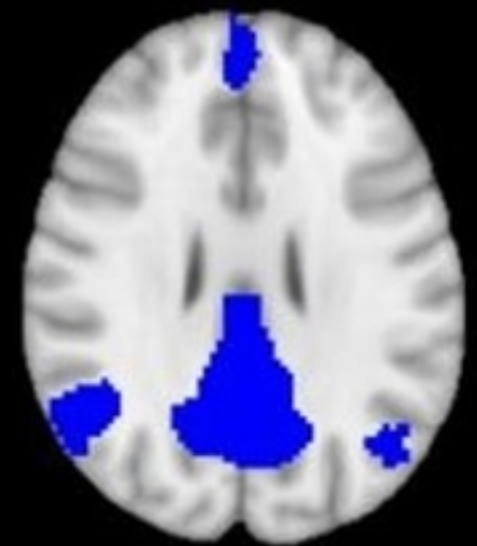

**Z = -61**

<https://doi.org/10.1101/2021.01.26.428223>; this version posted January 26, 2021. The copyright holder for this preprint (which was not certified by peer review) is the author/funder, who has granted bioRxiv a license to display the preprint in perpetuity. It is made available under aCC-BY 4.0 International license.

copyright holder for this preprint (which was not certified by peer review) is the author/funder, who has granted bioRxiv a license to display the preprint in perpetuity. It is made available under aCC-BY 4.0 International license.

**CEN**

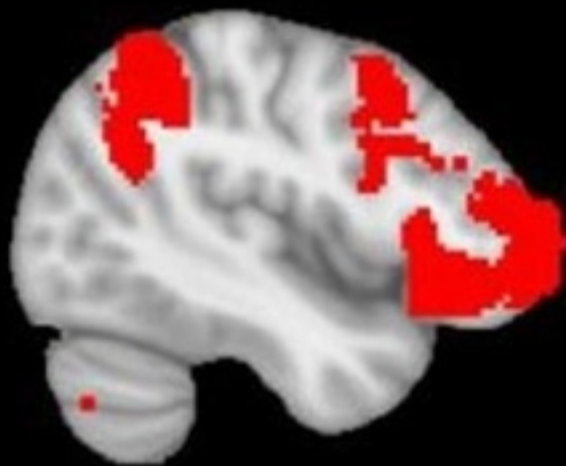

**X = -44**

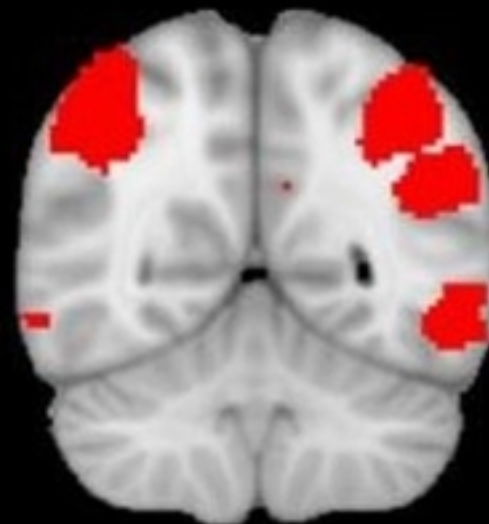

**Y = -55**

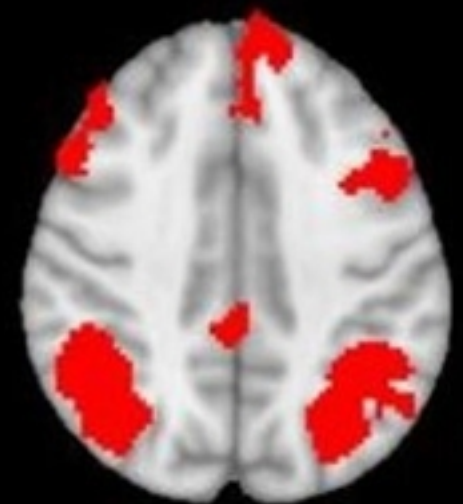

**Z = 44**

**SN**

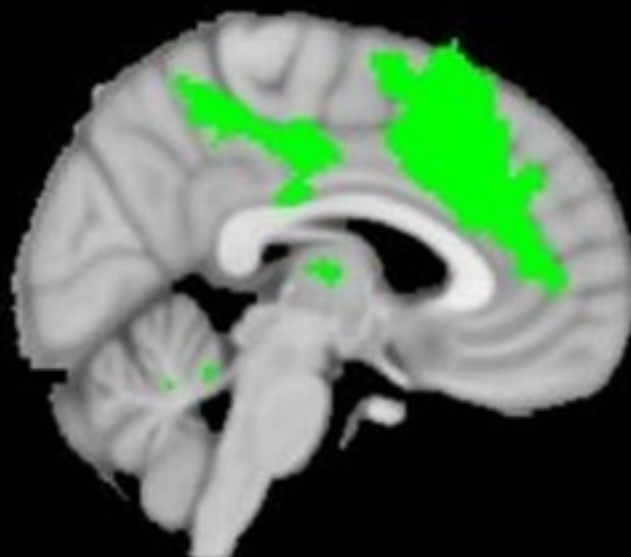

**X = 4**

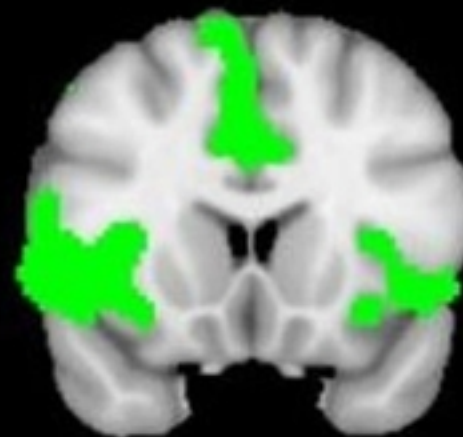

**Y = 16**

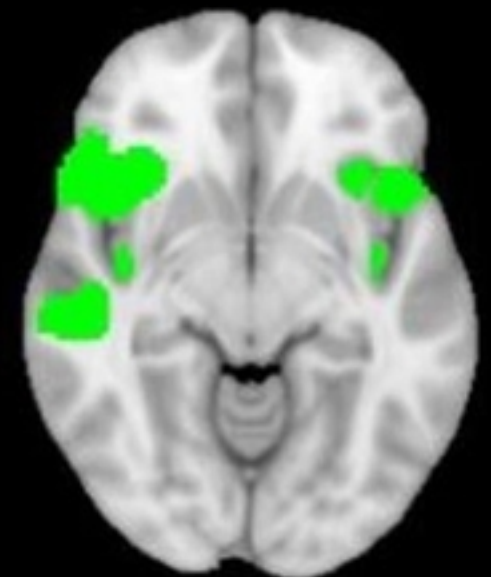

**Z = 8**

Fig2

Pre-task RS

Task<sub>(Whole)</sub>

Post-task RS

<https://doi.org/10.1101/2021.01.26.428223>  
of review) is the author/funder, who has granted bioRxiv a license to display the preprint in perpetuity. It is made available under aCC-BY 4.0 International license.

ALFF

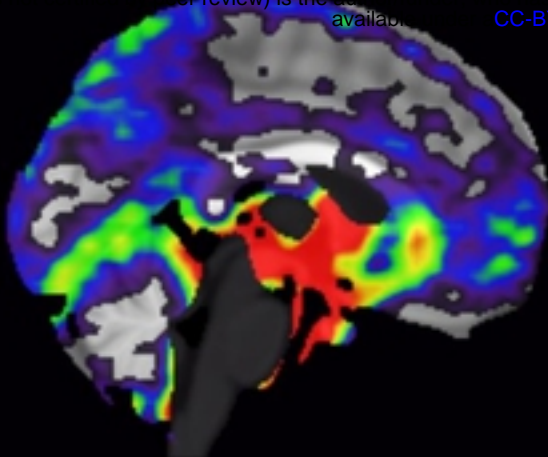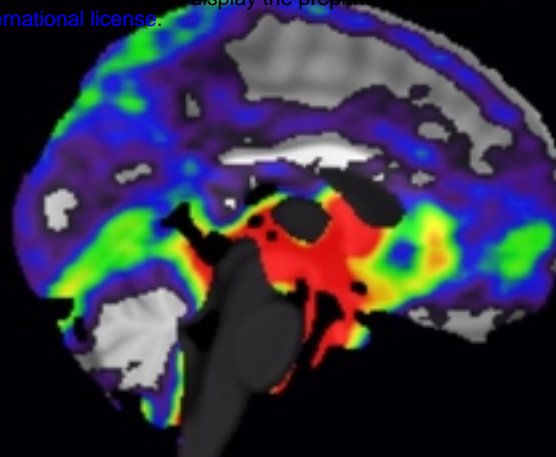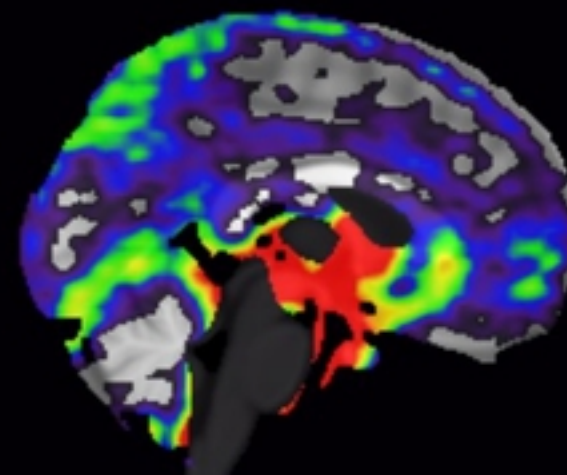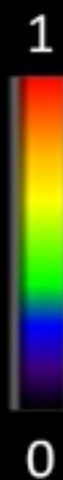

ReHo

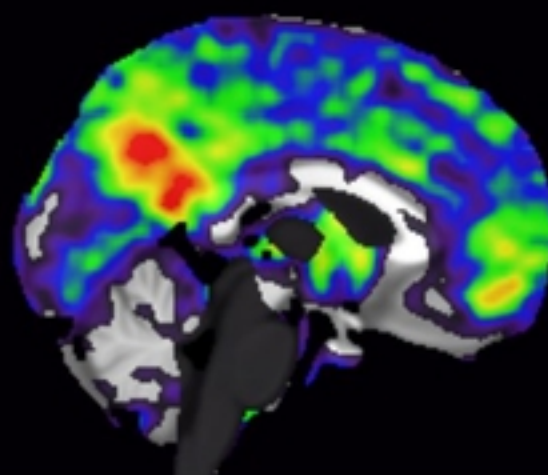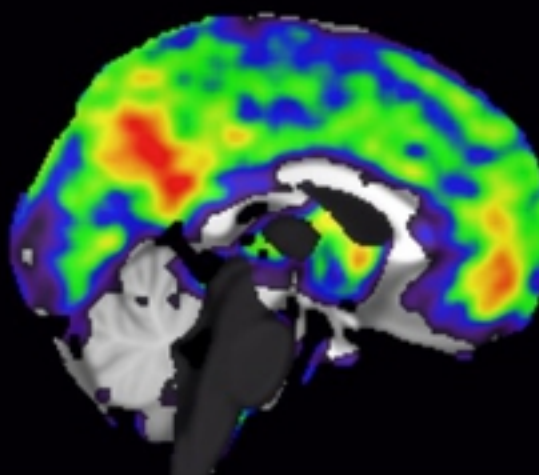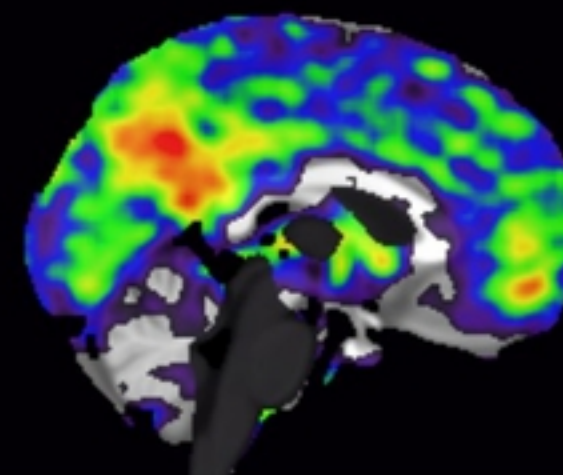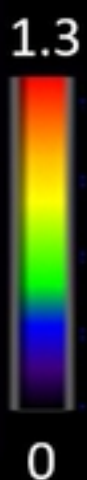

DC

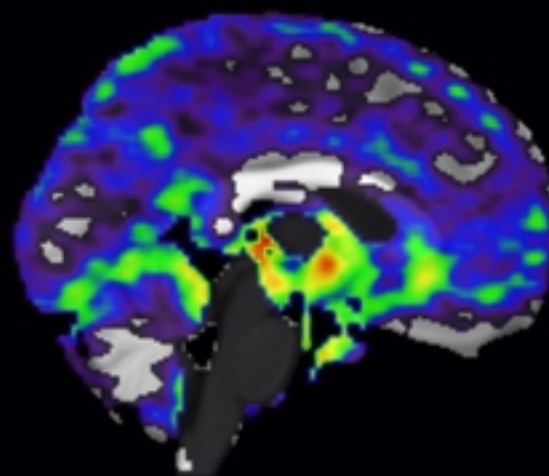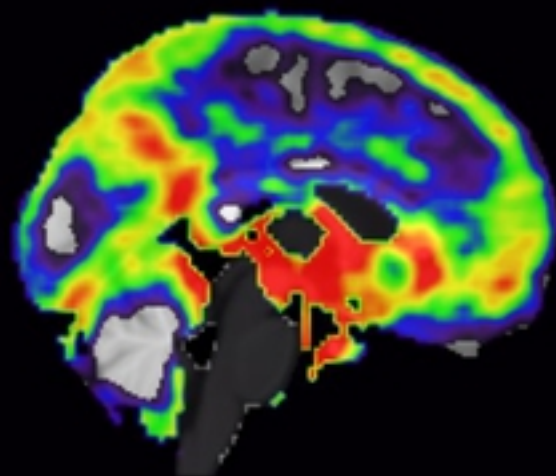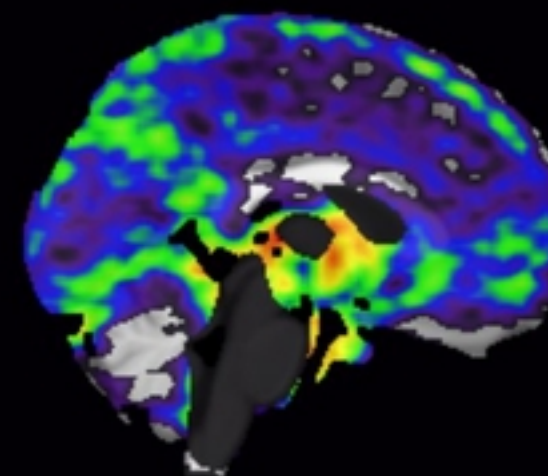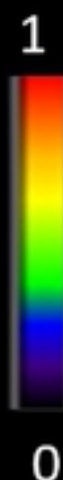

X = 0

X = 0

X = 0

Fig3

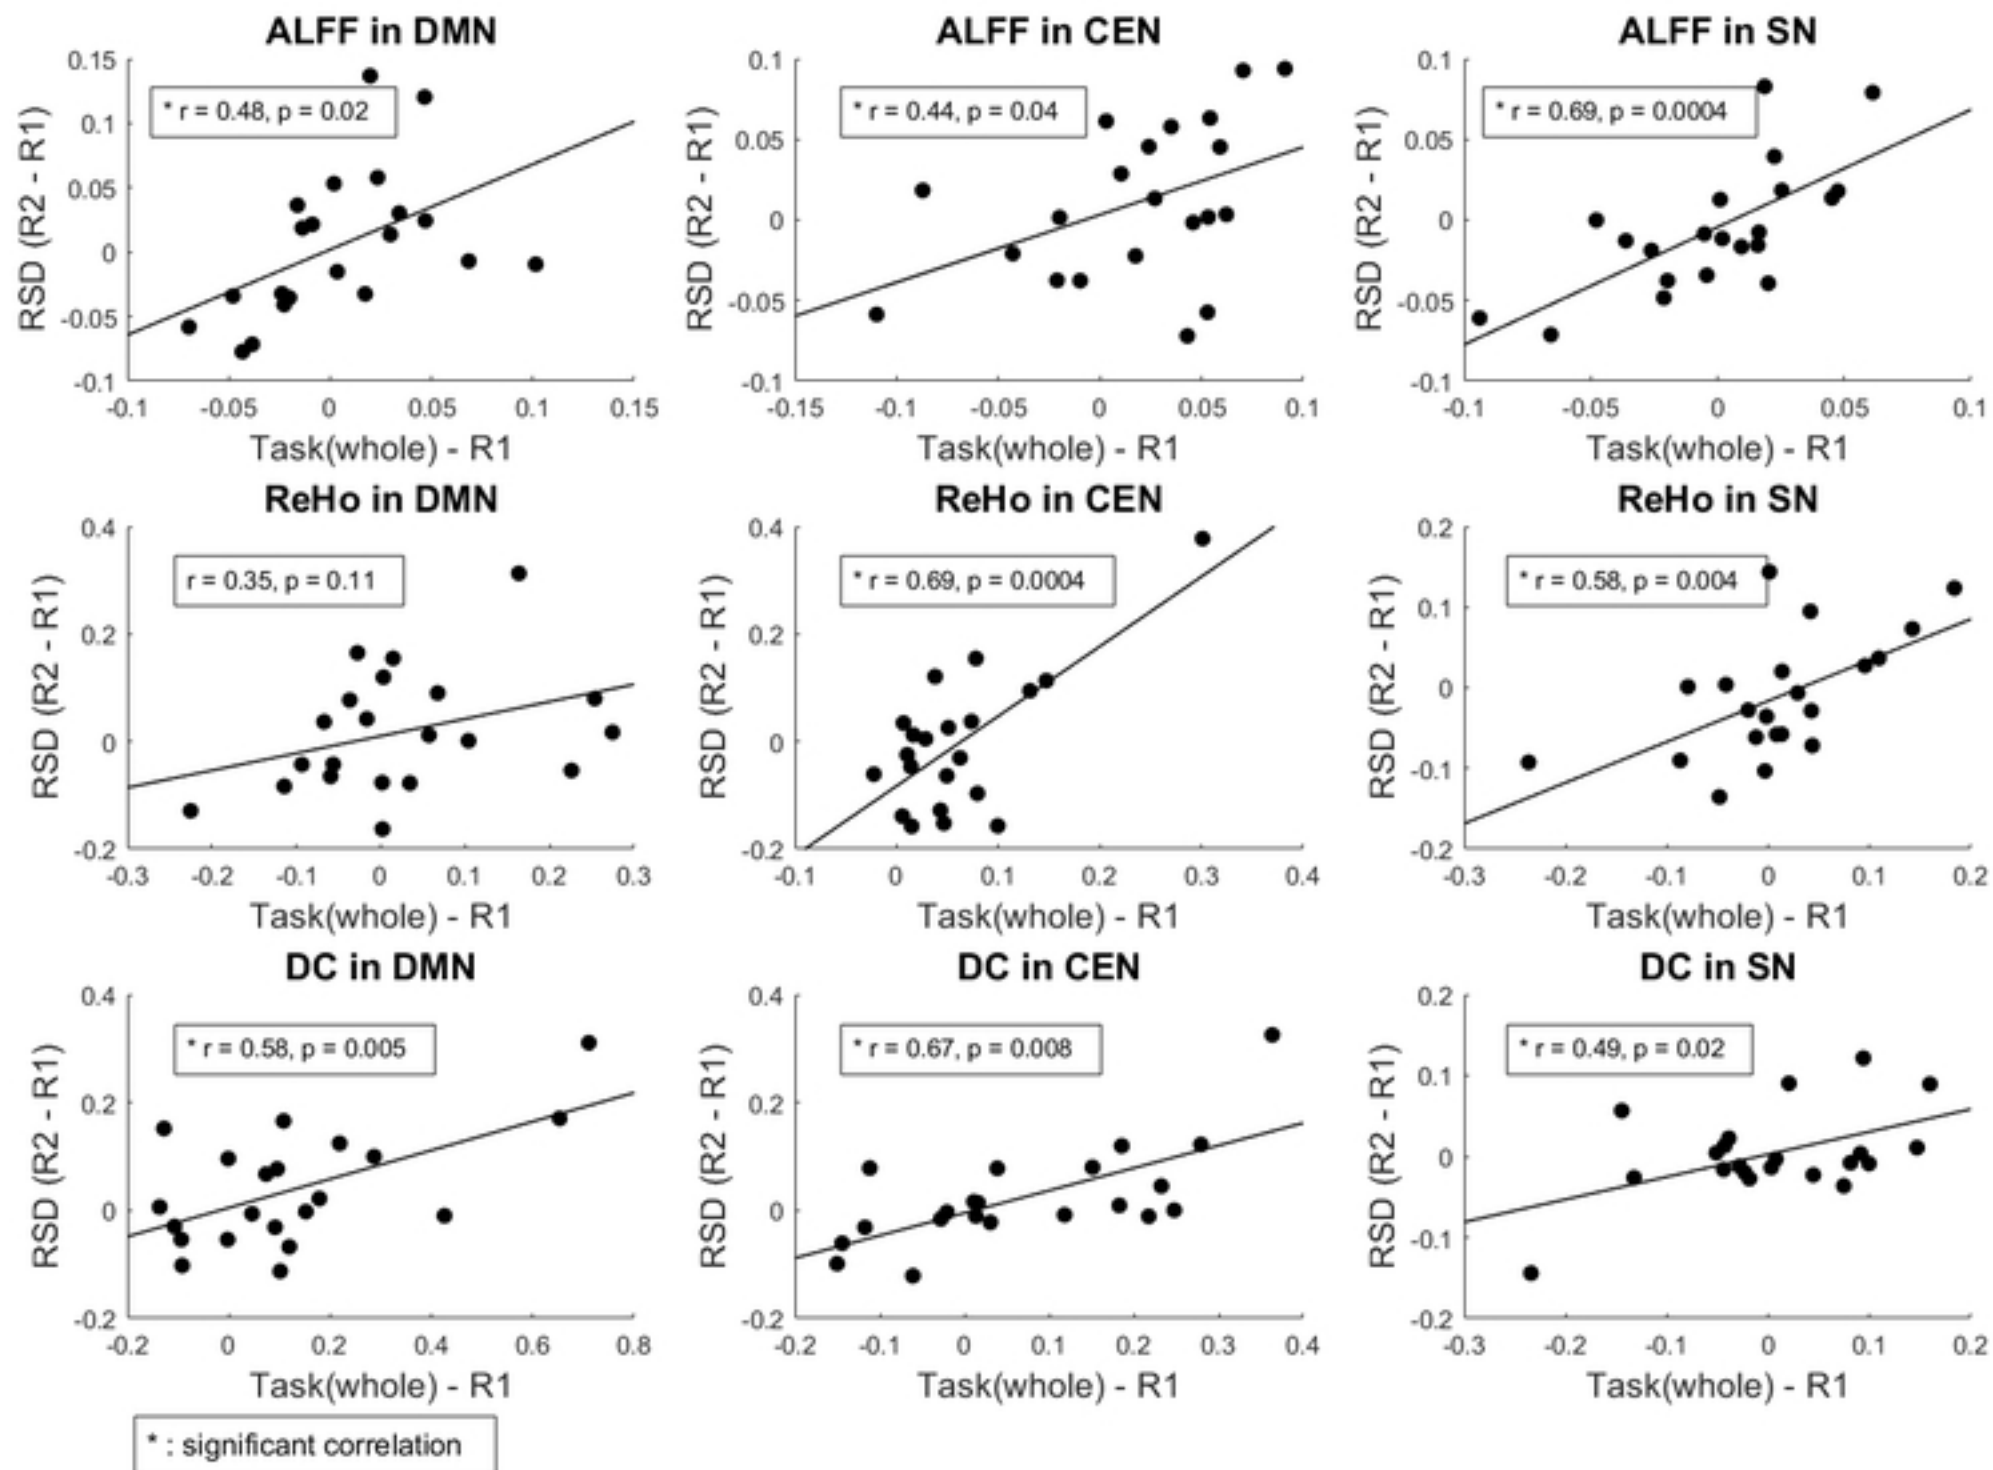

Fig4

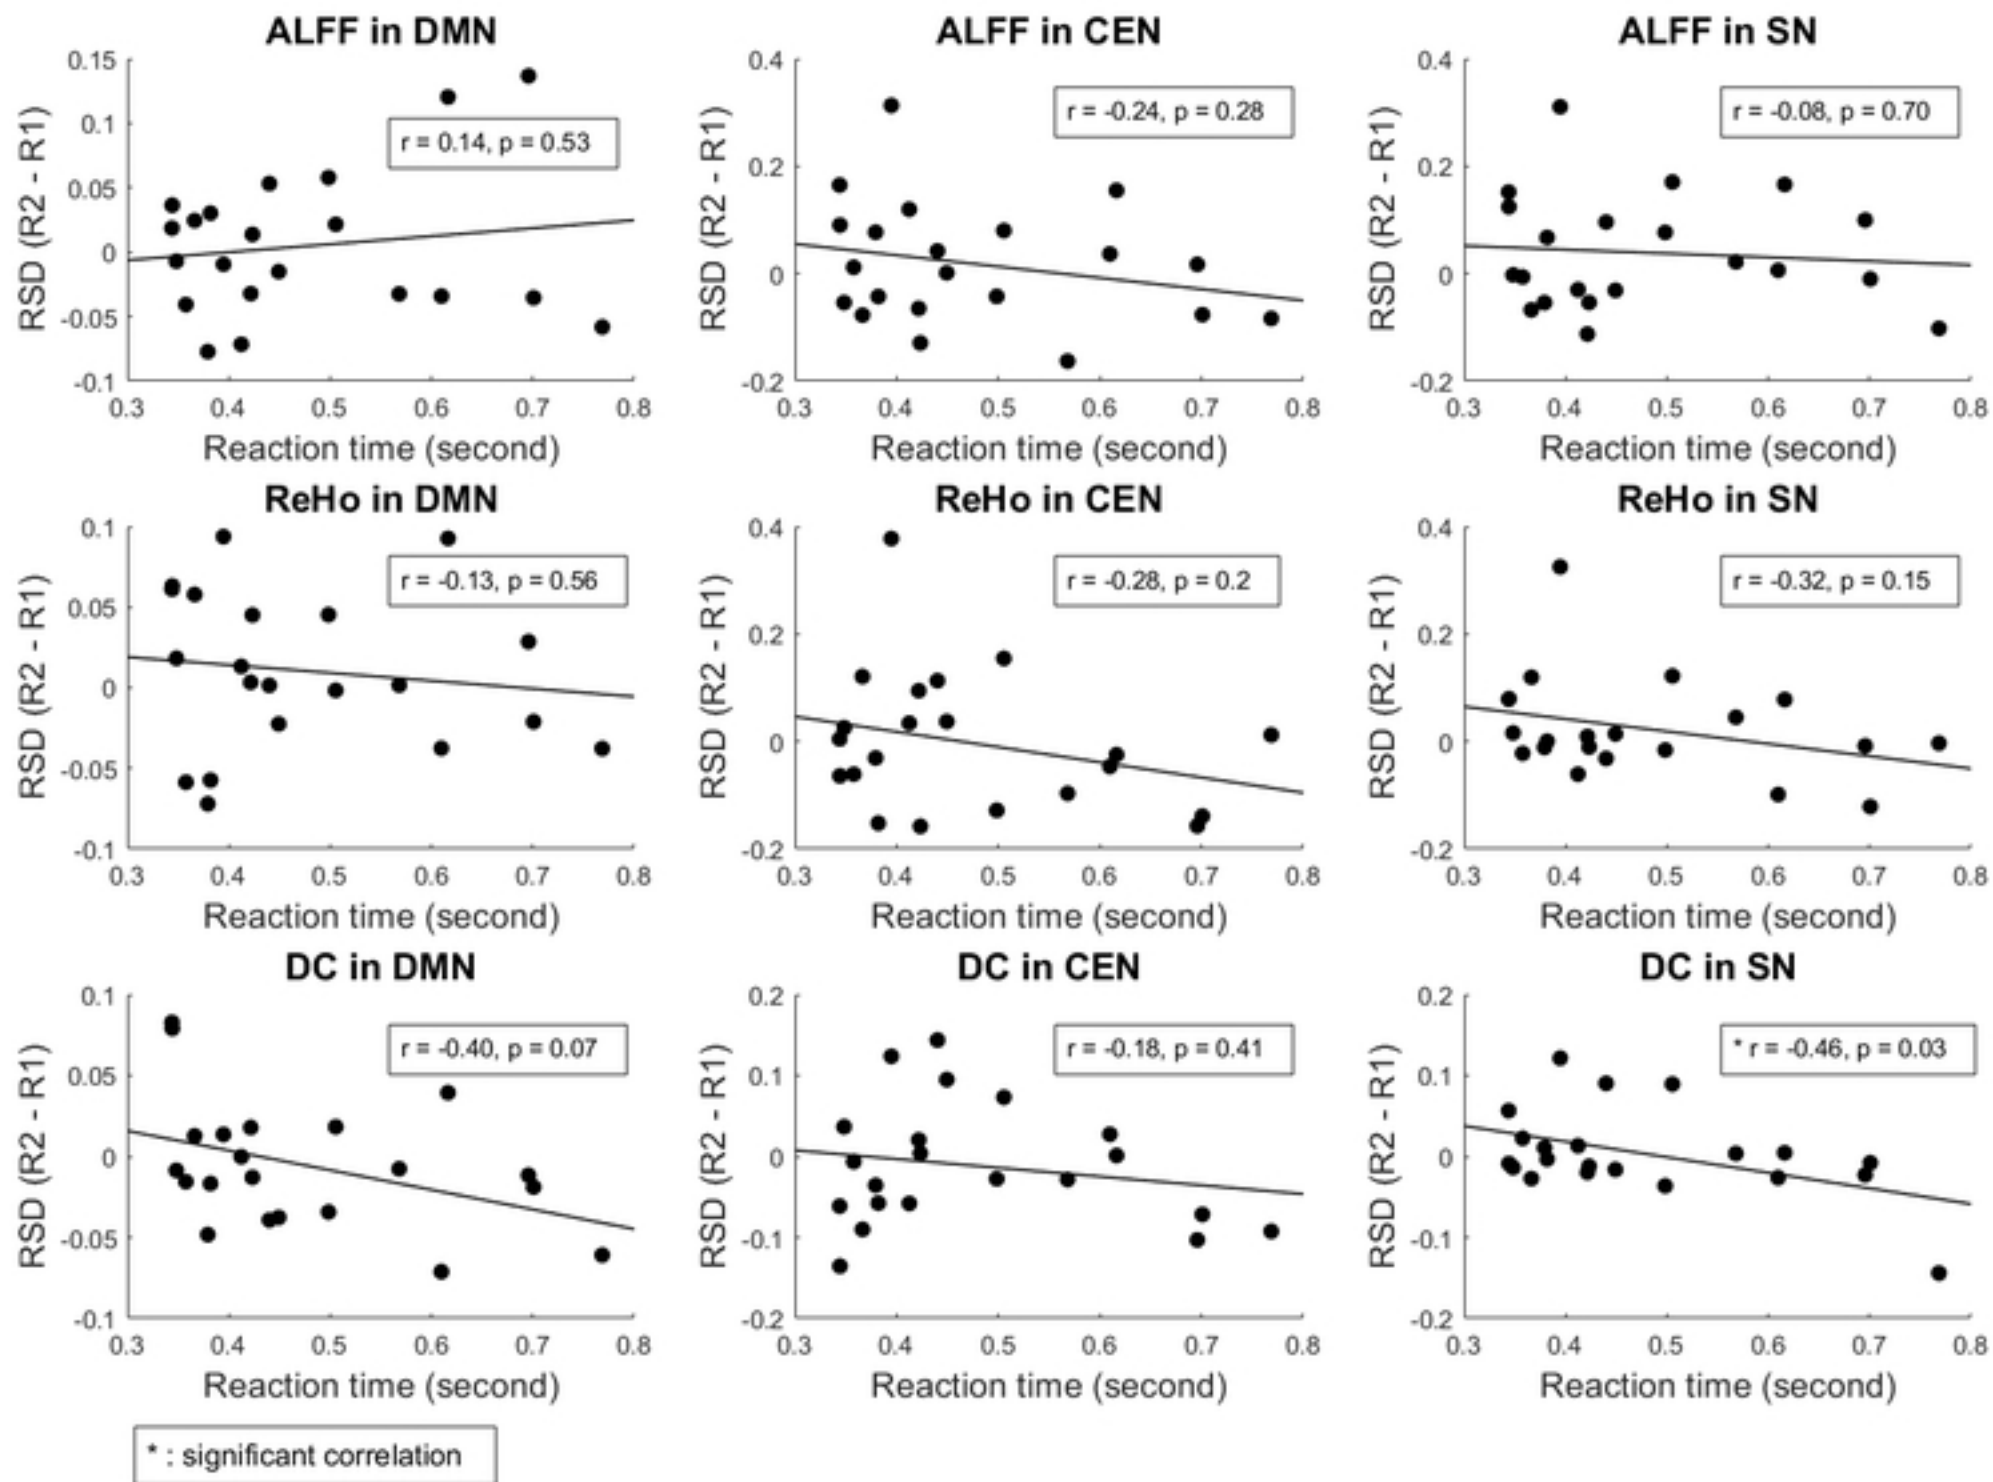

Fig5

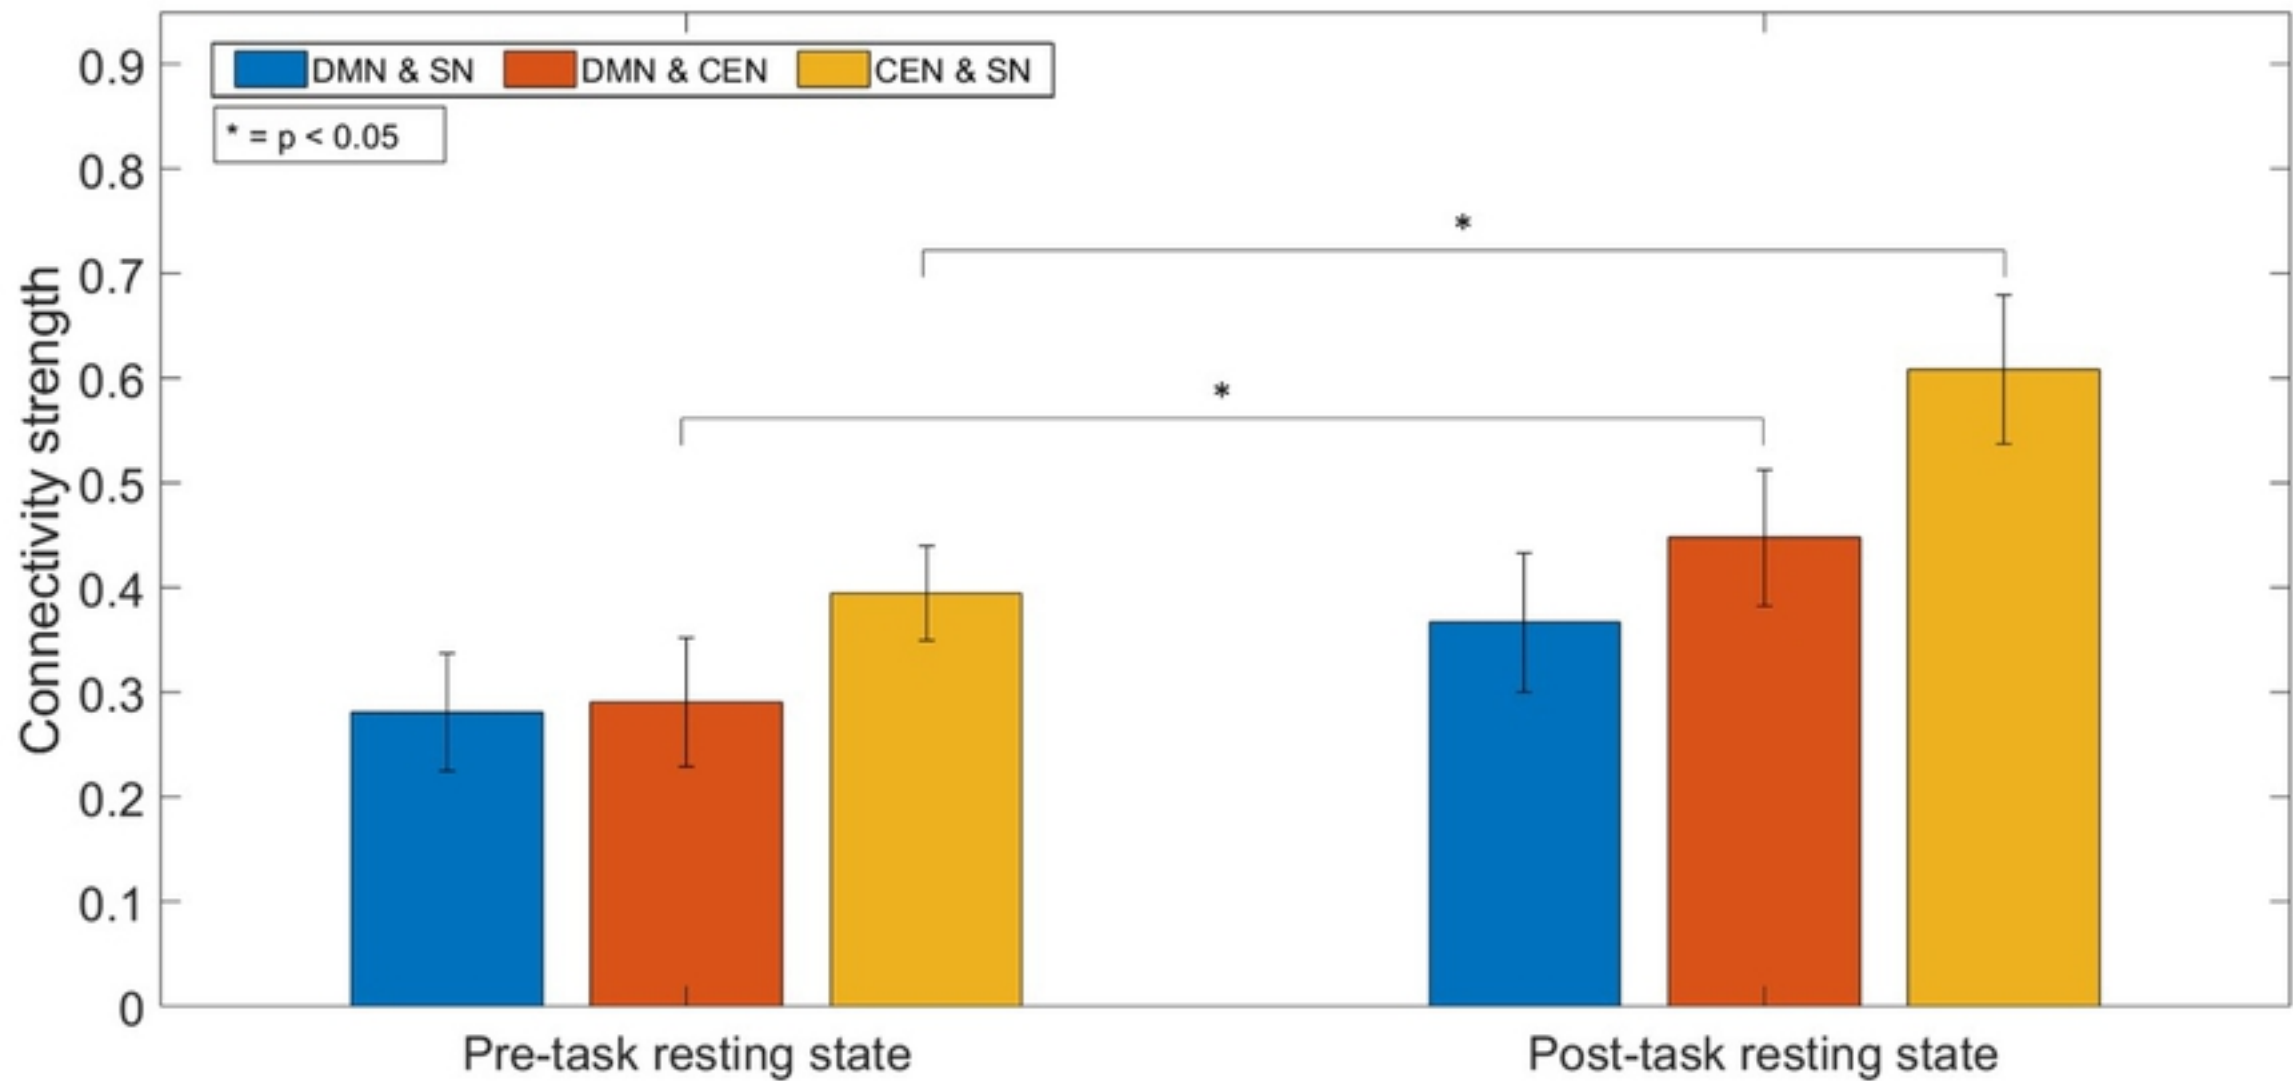

Fig6
